# Supplementary material for: The “χ” of the Matter: Testing the Relationship between Paleoenvironments and Three Theropod Clades
Source: PLoS One. 2016 Feb 1;11(2):e0147031. doi: 10.1371/journal.pone.0147031 (PMC4734717; doi:10.1371/journal.pone.0147031)
Supplement: S1 Dataset — (XLSX) [file pone.0147031.s002.xlsx]

## Sheet: Abelisauridae
Country (Continent)	Collection number (PaleoDB)	Possible paralogies	Dubious occurrences	Location	Taxon	References in PBDB	Fossil Record	Taphonomic category	Paleoenvironment	Lithology	Latitude	Longitude	Formation	Epoch	Earliest stage	Latest stage	Additional References
Argentina (SA)	DB 25534			Estancia Pocho Sastre	Carnotaurus	Bonaparte, 1985	Almost complete skeleton	1	Coastal	concretionary, hematitic siliciclastic sediments	43.0° S	67.5° W	La Colonia	Late Cretaceous	Campanian	Maastrichtian	[1]
	DB 28458	1		Aguada Grande	Ilokelesia	Coria and Salgado, 2000	Incomplete skeleton	1	Terrestrial	not reported	39.2° S	69.2° W	Huincul	Late Cretaceous	Late Cenomanian	Turonian
	DB 85501	1		Bustingorry's farm	Skorpiovenator	Canale et al., 2008	Almost complete skeleton	1	Terrestrial	sandstone	39.2° S	68.8° W	Huincul	Late Cretaceous	Late Cenomanian	Turonian
	DB 28459		X	Salitral Ojo de Agua	Quilmesaurus	Coria, 2001	Distal right femur and tibia	1	Terrestrial	-	39.5° S	67.4° W	Allen	Late Cretaceous	Late Campanian	Early Maastrichtian	[2, 3]
	DB 28461	2		Auca Mahuevo	Aucasaurus	Coria et al., 2002; Coria and Chiappe, 2000	Almost complete skeleton	1	Terrestrial	small; gray, green mudstone and sandstone	37.9° S	68.5° W	Anacleto	Late Cretaceous	Early Campanian	Middle Campanian
	DB 32339	2		Cantera de la Pala Mécanica	Abelisaurus	Bonaparte and Novas, 1985	Almost complete skull	1	Terrestrial	medium-grained, coarse, yellow sandstone	38.8° S	68.0° W	Anacleto	Late Cretaceous	Early Campanian	Middle Campanian
	DB 38952	3		6 km north of Estancia "Ocho Hermanos"	Xenotarsosaurus	Martínez et al., 1986; Bonaparte, 1984	Incomplete postcranial skeleton	1	Terrestrial	sandstone	45.3° S	69.6° W	Bajo Barreal (Lower Member)	Late Cretaceous	Late Cenomanian	Early Turonian	[2]
	DB 49099	3		6 km north of Estancia "Ocho Hermanos" (2)		Lamanna et al., 2002; Martínez et al., 1993	Isolated maxilla	2	Terrestrial	sandstone	45.3° S	69.6° W	Bajo Barreal (Lower Member)	Late Cretaceous	Late Cenomanian	Early Turonian
	DB 152253	3	X	Estancia Laguna Palacios "2005 Quarry"	Abelisauridae	Ibiricu et al, 2013; Lamanna et al., 2011, 2012	Partial skeleton	1	Terrestrial	lenticular, graded, coarse-grained, green sandstone	44.9° S	69.4° W	Bajo Barreal (Lower Member)	Late Cretaceous	Late Cenomanian	Early Turonian
	DB 49416	3		Cañadón de los Corrales		Martínez et al., 2004	Incomplete axial skeleton	1	Terrestrial	not reported	47.2° S	69.7° W	Bajo Barreal	Late Cretaceous	Middle Cenomanian	Early Coniacian
	DB 49098			Cerro Bayo Mesa		Leanza et al., 2004; Coria et al., 1996	Incomplete skeleton	1	Terrestrial	paleosol/pedogenic mudstone	39.1° S	69.2° W	Cerro Lisandro	Late Cretaceous	Middle Turonian	Late Turonian	[4]
	DB 49409			Bajo del Añelo, Candeleros	Ekrixinatosaurus	Calvo et al., 1999	Incomplete skeleton	1	Terrestrial	not reported	38.0° S	69.1° W	Candeleros	Late Cretaceous	Early Cenomanian	Early Cenomanian	[2]
	DB 49415*		X	Futalognko Quarry, Costa Dinosaurio		Juárez Valieri et al., 2011; Calvo et al., 2001	Left transverse process of a caudal vertebra	2	Terrestrial	fine-grained conglomerate and fine-grained sandstone	38.5° S	68.7° W	Portezuelo	Late Cretaceous	Late Turonian	Early Coniacian	[5]
	DB 90788		X	Estancia Mallín Grande, Cerro Crettón		del Corro, 1974	Isolated tooth	2	Terrestrial	not reported	44.9° S	69.2° W	Castillo (Upper Member)	Late Cretaceous	Cenomanian	Cenomanian
Brazil (SA)	DB 32335			Fazenda Roncador, Mato Grosso	Pycnonemosaurus	Bertini, 1996	Incomplete skeleton	1	Terrestrial	red, conglomeratic sandstone	15.5° S	54.6° W	Grupo Parecis	Late Cretaceous	Turonian	Santonian	[6]
	DB 56997	4		Florida Paulista - Fazenda Nelson Tarnorches		Candeiro et al., 2004; Torres et al., 2003	Isolated teeth	2	Terrestrial	tabular, fine-grained, red, yellow sandstone and red, yellow, conglomeratic sandstone	21.6° S	51.2° W	Adamantina	Late Cretaceous	Turonian	Santonian
	DB 57000	4		Santo Anastácio, São Paulo		Bertini et al., 1993; Candeiro et al., 2004	Isolated premaxilla and isolated teeth	2	Terrestrial	fine-grained, red, conglomeratic sandstone	21.9° S	51.4° W	Adamantina	Late Cretaceous	Turonian	Santonian	[7]
	DB 57003*	4	X	Alfredo Marcondes, São Paulo		Candeiro et al., 2004; Torres et al., 2003	Isolated tooth	2	Terrestrial	fine-grained, red, conglomeratic sandstone	21.9° S	51.4° W	Adamantina	Late Cretaceous	Turonian	Santonian
	DB 61578*	4	X	Serra de Boa Vista, Prata, Minas Gerais		Candeiro et al., 2006; Almeida et al., 2003	Isolated tooth	2	Terrestrial	bioturbated, fine-grained, medium, red sandstone and conglomerate	19.5° S	49.2° W	Adamantina	Late Cretaceous	Turonian	Santonian
	DB 156131	4		Monte Alto		Tavares et al, 2014	Isolated teeth	2	Terrestrial	not reported	21.2° S	48.5° W	Adamantina	Late Cretaceous	Turonian	Santonian
	DB 64133*	5		Peirópolis, Minas Gerais		Candeiro et al., 2006; Santucci and Bertini, 2001	Isolated teeth	2	Terrestrial	white, yellow, conglomeratic sandstone and mudstone	19.6° S	47.6° W	Marília (Serra da Galga Member)	Late Cretaceous	Maastrichtian	Maastrichtian
	DB 80824	5		Outcrop BR-050 A (km 153.5), Minas Gerais		Novas et al., 2008	Isolated postcranial remains	2	Terrestrial	coarse-grained, intraclastic sandstone	19.6° S	48.0° W	Marília (Serra da Galga Member)	Late Cretaceous	Maastrichtian	Maastrichtian
Colombia (SA)	DB 95168			Ortega locality, Tolima		Langston, 1953	Isolated teeth	2	Terrestrial	sandstone and claystone	3.9° S	75.2° W	Upper Magdalena Basin	Late Cretaceous	Maastrichtian	Maastrichtian	[8]
Egypt (Af)	DB 60599	6	X	Sciarauna-el-Ghibli		Smith and Lamanna, 2006; Gemmelaro, 1921	Isolated tooth	2	Marine	phosphorite	25.2° N	32.7° E	Duwi	Late Cretaceous	Maastrichtian	Maastrichtian
	DB 60607	6	X	Kosseir-el-Khadim		Krause et al., 2007; Gemmelaro, 1921	Isolated teeth and phalanges	2	Marine	phosphorite	25.2° N	32.7° E	Duwi	Late Cretaceous	Maastrichtian	Maastrichtian
	DB 60608	6	X	Gebel Duwi		Krause et al., 2007; Gemmelaro, 1921	Isolated teeth and phalanges	2	Marine	phosphorite	25.2° N	32.7° E	Duwi	Late Cretaceous	Maastrichtian	Maastrichtian
France (Eu)	DB 48849			La Boucharde		Carrano and Sampson, 2008; Allain and Taquet, 2000	Isolated tibia	2	Terrestrial	sandstone	43.4° N	5.7° E	Unnamed Begudien beds	Late Cretaceous	Late Campanian	Early Maastrichtian
	DB 48870			Massecaps locality, Cruzy		Buffetaut et al., 1999; Buffetaut, 1998	Isolated teeth	2	Terrestrial	ferruginous claystone and sandstone	43.3° N	3.0° E	Rognacian beds (Grès à Reptiles)	Late Cretaceous	Late Campanian	Early Maastrichtian	[2]
	DB 51692			Porcieux		Buffetaut et al., 1988	Isolated maxilla	2	Terrestrial	coarse-grained sandstone	45.8° N	5.4° E	Unnamed Upper Rognacian beds (Grès à Reptiles)	Late Cretaceous	Maastrichtian	Maastrichtian	[2]
	DB 59887		X	Montplô Nord, Cruzy		Fléaux, 1999	Isolated femur	2	Terrestrial	red marl and sandstone	43.3° N	3.0° E	-	Late Cretaceous	Late Campanian	Early Maastrichtian	[9]
	DB 89990			A8 motorway, Pourrières	Arcovenator escotae	Buffetaut, 2008; Tortosa et al., 2014	Incomplete skeleton	1	Terrestrial	sandstone	43.5° N	5.7° E	Lower Argiles Rutilantes	Late Cretaceous	Late Campanian	Late Campanian
Hungary (Eu)	DB 48722			Iharkút mine, Bakony mountains		Osi et al., 2003	Isolated teeth	2	Terrestrial	sandy claystone and gray, argillaceous sandstone	47.2° N	17.6° E	Csehbánya	Late Cretaceous	Santonian	Santonian
India (In)	DB 26373	7		Carnosaur Bed, Bara Simla	Indosuchus, Lametasaurus (and Indosaurus)	Huene and Matley, 1933; Matley, 1919	Cranial and postcranial remains, some of them possibly associated	1	Terrestrial	glauconitic, green sandstone	23.2° N	80.0° E	Lameta (Carnosaur Bed Member)	Late Cretaceous	Maastrichtian	Maastrichtian	[2, 3]
	DB 34725	7		Temple Hill, Rahioli (cgl)	Rajasaurus	Wilson et al., 2003; Dwivedi et al., 1985	Incomplete skeleton	1	Terrestrial	calcareous, cherty/siliceous conglomerate and sandy, calcareous sandstone	23.1° N	73.3° E	Lameta	Late Cretaceous	Maastrichtian	Maastrichtian
	DB 38401	7	X	Temple Hill, Rahioli (ss)	cf. Majungassaurus	Krause et al., 2007; Mathur and Srivastava, 1987	Isolated tooth	2	Terrestrial	medium-grained, calcareous sandstone and pebbly, green, white conglomerate	23.1° N	73.3° E	Lameta Group	Late Cretaceous	Maastrichtian	Maastrichtian	[2]
	DB 95807	7		Rahioli Village	Rahiolisaurus	Novas et al., 2010; Chatterjee & Rudra, 1996	Incomplete postcranial skeleton	1	Terrestrial	mudstone	23.1° N	73.3° E	Lameta	Late Cretaceous	Maastrichtian	Maastrichtian
	DB 153666			Kallamedu Field Site		Prasad et al., 2013	Isolated teeth	2	Marine	red claystone and sandstone	11.1° N	79.1° E	Kallamedu	Late Cretaceous	Maastrichtian	Maastrichtian
Lybia (Af)	DB 61465		X	Nalut		Dalla Vecchia, 1995	Isolated tooth	2	Coastal	sandstone	31.9° N	11.0° E	Cabao	Early Cretaceous	Hauterivian	Barremian
Madagascar (Af)	DB 25074	8		MAD93-18, Mahajanga	Majungassaurus	Sampson et al., 1998; Forster et al., 1996	Articulated and disarticulated postcranial remains	1	Terrestrial	sandstone	15.9° S	46.6° E	Maevarano (Anembalemba Member)	Late Cretaceous	Maastrichtian	Maastrichtian	[10]
	DB 32366	8		MAD93-33, Mahajanga	Majungassaurus	Sampson et al., 1996	Isolated premaxilla	2	Terrestrial	yellow sandstone	15.9° S	46.6° E	Maevarano (Anembalemba Member)	Late Cretaceous	Maastrichtian	Maastrichtian
	DB 39265	8		MAD96-01, Mahajanga	Majungassaurus	Rogers et al., 2003; Krause et al., 1997	Skull and postcranial remains (FMNH PR 2100)	1	Terrestrial	white sandstone	15.9° S	46.6° E	Maevarano (Anembalemba Member)	Late Cretaceous	Maastrichtian	Maastrichtian
	DB 48389	8		MAD96-21, Mahajanga	Majungassaurus	Sampson et al., 1998	Skull and postcranial remains (UA 8678)	1	Terrestrial	white sandstone	15.9° S	46.6° E	Maevarano (Anembalemba Member)	Late Cretaceous	Maastrichtian	Maastrichtian
	DB 55268	8		MAD93-01, Mahajanga	Majungassaurus	Krause et al., 2007; Dodson et al., 1998	Isolated astragalocalcaneum and isolated quadrate	2	Terrestrial	not reported	15.9° S	46.6° E	Maevarano (Anembalemba Member)	Late Cretaceous	Maastrichtian	Maastrichtian
	DB 55270	8		MAD93-73, Mahajanga	Majungassaurus	Krause et al., 2007; Dodson et al., 1998	Isolated tibia	2	Terrestrial	not reported	15.9° S	46.6° E	Maevarano (Anembalemba Member)	Late Cretaceous	Maastrichtian	Maastrichtian
	DB 55271	8		MAD96-07, Mahajanga	Majungassaurus	Dodson et al., 1998	Isolated phalanx	2	Terrestrial	not reported	15.9° S	46.6° E	Maevarano (Anembalemba Member)	Late Cretaceous	Maastrichtian	Maastrichtian
	DB 71399	8		south of RN4, Berivotra	Majungassaurus	Fanti and Therrien, 2007	Isolated teeth	2	Terrestrial	claystone	15.9° S	46.6° E	Maevarano (Anembalemba Member)	Late Cretaceous	Maastrichtian	Maastrichtian	[10]
	DB 84840	8		MAD99-33, Mahajanga	Majungassaurus	Krause et al., 2007	Almost complete skull and other isolated cranial and postrcranial remains	1	Terrestrial	not reported	15.9° S	46.6° E	Maevarano (Anembalemba Member)	Late Cretaceous	Maastrichtian	Maastrichtian
	DB 84841	8		MAD99-26, Mahajanga	Majungassaurus	Krause et al., 2007	Incomplete skeleton	1	Terrestrial	not reported	15.9° S	46.6° E	Maevarano (Anembalemba Member)	Late Cretaceous	Maastrichtian	Maastrichtian
	DB 84842	8		MAD93-20, Mahajanga	Majungassaurus	Krause et al., 2007	Isolated phalanx	2	Terrestrial	not reported	15.9° S	46.6° E	Maevarano (Anembalemba Member)	Late Cretaceous	Maastrichtian	Maastrichtian
	DB 84843	8		MAD93-19, Mahajanga	Majungassaurus	Krause et al., 2007	Isolated phalanx	2	Terrestrial	not reported	15.9° S	46.6° E	Maevarano (Anembalemba Member)	Late Cretaceous	Maastrichtian	Maastrichtian
	DB 84844	8		MAD95-14, Mahajanga	Majungassaurus	Krause et al., 2007	Isolated vertebra	2	Terrestrial	not reported	15.9° S	46.6° E	Maevarano (Anembalemba Member)	Late Cretaceous	Maastrichtian	Maastrichtian
	DB 84845	8		MAD99-32, Mahajanga	Majungassaurus	Krause et al., 2007	Isolated phalanges	2	Terrestrial	not reported	15.9° S	46.6° E	Maevarano (Anembalemba Member)	Late Cretaceous	Maastrichtian	Maastrichtian
	DB 84846	8		MAD01-05, Mahajanga	Majungassaurus	Krause et al., 2007	Partial skull roof	1	Terrestrial	not reported	15.9° S	46.6° E	Maevarano (Anembalemba Member)	Late Cretaceous	Maastrichtian	Maastrichtian
	DB 84847	8		MAD95-16, Mahajanga	Majungassaurus	Krause et al., 2007	Isolated phalanx	2	Terrestrial	not reported	15.9° S	46.6° E	Maevarano (Anembalemba Member)	Late Cretaceous	Maastrichtian	Maastrichtian
	DB 84848	8		MAD96-18, Mahajanga	Majungassaurus	Krause et al., 2007	Isolated phalanx	2	Terrestrial	not reported	15.9° S	46.6° E	Maevarano (Anembalemba Member)	Late Cretaceous	Maastrichtian	Maastrichtian
	DB 85063	8		MAD05-42, Mahajanga	Majungassaurus	Rogers et al., 2007	Isolated skeleton and isolated skull	1	Terrestrial	not reported	15.9° S	46.6° E	Maevarano (Anembalemba Member)	Late Cretaceous	Maastrichtian	Maastrichtian
	DB 88176	8		Vavaranonantsahalava		Maganuco et al., 2008	Isolated phalanges	2	Terrestrial	not reported	15.9° S	46.6° E	Maevarano (Anembalemba Member)	Late Cretaceous	Maastrichtian	Maastrichtian
	DB 91206	8		MAD05-04, Mahajanga	Majungassaurus	Burch and Carrano, 2011; Gaffney et al., 2009	Articulated girdle and forelimb	1	Terrestrial	not reported	15.9° S	46.6° E	Maevarano (Anembalemba Member)	Late Cretaceous	Maastrichtian	Maastrichtian
	DB 51252	8		Maevarano, Betsiboka River	Majungassaurus	Boule, 1900	Isolated teeth	2	Terrestrial	sandstone	15.9° S	46.5° E	Maevarano	Late Cretaceous	Maastrichtian	Maastrichtian
	DB 59692	8		Mevarana site 2	"Megalosaurus"	Dépéret, 1896	Isolated teeth and postrcranial remains	2	Terrestrial	argillaceous sandstone	15.9° S	46.5° E	Maevarano	Late Cretaceous	Maastrichtian	Maastrichtian
	DB 70075	8		Berivotra microsite	Majungassaurus	Russell et al., 1976	Partial skeleton	1	Terrestrial	not reported	15.9° S	46.5° E	Maevarano	Late Cretaceous	Maastrichtian	Maastrichtian	[10, 11]
	DB 102481	8		ravine north of Berivotra	Majungassaurus	Lavocat, 1955	Isolated fragmentary dentary	2	Terrestrial	sandstone	15.9° S	46.6° E	Maevarano	Late Cretaceous	Maastrichtian	Maastrichtian	[10]
Morocco (Af)	DB 52887***	9		Tafilalt		Krause et al., 2007; Russell, 1996	Incomplete dentary	2	Terrestrial	red sandstone	30.9° N	4.0° W	Kem Kem	Early/Late Cretaceous	Albian	Cenomanian
	DB 123828	9		Begaa		D'Orazzi Porchetti et al., 2011	Isolated incomplete maxillae	2	Terrestrial	sandstone	30.9° N	3.9° W	Kem Kem (Lower Member)	Late Cretaceous	Cenomanian	Cenomanian
	DB 141307***	9		Near Taouz		Richter et al., 2013	Isolated teeth	2	Terrestrial	red sandstone	30.9° N	4.0° W	Kem Kem	Late Cretaceous	Cenomanian	Cenomanian
	DB 54004		X	Oued Zem theropod tooth (Khourigbga)		Buffetaut et al., 2005	Isolated tooth	2	Terrestrial	brown, yellow, sandy phosphorite	32.9° N	6.6° W	Ouled Abdoun Basin	Late Cretaceous	Maastrichtian	Maastrichtian
Niger (Af)	DB 58577***			Iguidi	Rugops	Sereno et al., 2004	Incomplete skull	1	Terrestrial	not reported	17.9° N	5.6° E	Echkar	Late Cretaceous	Cenomanian	Cenomanian
	DB 81086*			Gadoufaoua, G138 (Kriptops type)	Kriptops	Sereno and Brusatte, 2008	Incomplete skeleton	1	Terrestrial	not reported	16.4° N	9.1° E	Elrhaz	Late Cretaceous	Aptian	Albian
Portugal (Eu)	DB 154211			Cliffs of Lourinhã		Hendrickx and Mateus, 2014	Two isolated teeth	2	Coastal	not reported	39.2° N	9.3° W	Lourinhã	Late Jurassic	Kimmeridgian	Kimmeridgian
Romania (Eu)	DB 59410		X	Szentpéterfalva (Sânpetru)		Csiki and Grigorescu, 1998; Nopcsa, 1900	Distal femur	2	Terrestrial	not reported	45.6° N	22.9° E	Sânpetru	Late Cretaceous	Maastrichtian	Maastrichtian
Saudi Arabia (As)	DB 153528		X	Al Khurybah		Kear et al, 2013	Two isolated teeth	2	Marine	sandstone and conglomerate	28.7° N	35.3° E	Adaffa	Late Cretaceous	Campanian	Maastrichtian
Spain (Eu)	DB 28406		X	Laño L1A		Astibia et al., 1990; Sanz, 1986	?	?	Marine	hardground, conglomeratic sandstone and black siltstone	42.7° N	2.6° W	Vitoria	Late Cretaceous	Late Campanian	Late Campanian	[2]
	*Shared with Carcharodontosauridae
	**Shared with Spinosauridae
	***Shared by all
								X
								X (?)

## Sheet: Carcharodontosauridae
Country (Continent)	Collection number (PaleoDB)	Possible paralogies	Dubious occurrences	Location	Taxon	References in PBDB	Fossil Record	Taphonomic category	Paleoenvironment	Lithology	Latitude	Longitude	Formation	Epoch	Earliest stage	Latest stage	Additional References
Algeria (Af)	DB 25137	1		south of Alrar	Carcharodontosaurus saharicus	Lapparent, 1960	Isolated post-cranial elements	2	Terrestrial	not reported	28.5° N	9.6° E	Continental Intercalaire	Early Cretaceous	Early Berriasian	Late Albian
	DB 25139	1		Foggara Ben Draou, Aoulef Cheurfa	Carcharodontosaurus saharicus	Lapparent, 1960; Lapparent, 1947	Isolated vertebrae	2	Terrestrial	not reported	27.0° N	1.1° E	Continental Intercalaire	Early Cretaceous	Early Berriasian	Late Albian
	DB 25192	1	X	Djoua Valley, 120 km east of Fort Flatters	Carcharodontosaurus saharicus	Lapparent, 1957	Isolated claw	2	Terrestrial	not reported	28.2° N	8.2° E	Continental Intercalaire	Early Cretaceous	Early Albian	Early Cenomanian	[12]
	DB 59689	1		2 km from Timimoun	Carcharodontosaurus saharicus	Depéret and Savornin, 1925	Isolated tooth*	2	Terrestrial	not reported	29.3° N	0.3° E	Continental Intercalaire	Early Cretaceous	Albian	Albian
	DB 59690	1		5 km from Timimoun	Carcharodontosaurus saharicus	Huene, 1956; Depéret and Savornin, 1925	Isolated tooth*	2	Terrestrial	not reported	29.3° N	0.3° E	Continental Intercalaire	Early Cretaceous	Albian	Albian
Argentina (SA)	DB 13209		X	Arroyo El Morterito	Unquillosaurus ceibalii	Powell, 1979; Bonaparte and Bossi, 1967	isolated pubis	2	Terrestrial	lithified, micaceous, gray, red, conglomeratic sandstone and lithified, pebbly, gray, green, calcareous sandstone	24.3° S	65.3° W	Los Blanquitos	Late Cretaceous	Campanian	Campanian	[13]
	DB 28460	2		15 km from El Chocón (Giganotosaurus type)	Giganotosaurus carolinii	Coria and Sagado, 1994	Nearly complete skeleton	1	Terrestrial	not reported	39.5° S	68.8° W	Candeleros	Late Cretaceous	Early Cenomanian	Early Cenomanian	[14]
	DB 51944	2		Los Candeleros	Giganotosaurus carolinii	Calvo, 1999	isolated left dentary	1	Terrestrial	not reported	39.2° S	69.6° W	Candeleros	Late Cretaceous	Early Cenomanian	Early Cenomanian	[15]
	DB 51945	2	X	Villa El Chocón	Giganotosaurus sp.	Calvo, 1999	Isolated tooth	2	Terrestrial	not reported	39.2° S	68.7° W	Candeleros	Late Cretaceous	Early Cenomanian	Early Cenomanian
	DB 38529	3		La Juanita Estancia, Cerro Barcino	Tyrannotitan chubutensis	Rich et al., 1998	two desarticulated partial skeletons	2	Terrestrial	not reported	43.8° S	68.8° W	Cerro Castaño Member (Cerro Barcino Formation)	Early Cretaceous	Aptian	Aptian
	DB 38531	3		Leaellyn's site 3 (Chubut Locality 1997-1)	cf. Tyrannotitan sp.	Rich et al., 1998	Isolated teeth	2	Terrestrial	not reported	43.8° S	68.6° W	Cerro Castaño Member (Cerro Barcino Formation)	Early Cretaceous	Aptian	Aptian
	DB 38533		X	Cerro Barcino (Chubutisaurus type)		del Corro, 1966	isolted tooth	2	Terrestrial	intraclastic, gray, green siliciclastic sediments	43.4° S	68.3° W	Bayo Overo Member (Cerro Barcino Formation)	Early Cretaceous	Albian	Cenomanian
	DB 49415*			Futalognko Quarry, Costa Dinosaurio	Carcharodontosauridae indet.	Veralli and Calvo, 2003; Calvo et al., 2001	isolated teeth	2	Terrestrial	fine-grained conglomerate and fine-grained sandstone	38.5° S	68.7° W	Portezuelo	Late Cretaceous	Late Turonian	Early Coniacian
	DB 61237**		X	El Anfiteatro, La Bajada sector	cf. Carcharodontosauridae indet.	Canudo et al., 2004	Isolated tooth	2	Terrestrial	red claystone and medium-grained, green, yellow sandston	39.3° S	68.5° W	Cerro Lisandro	Late Cretaceous	Middle Turonian	Late Turonian
	DB 55351			Cañadón del Gato (=Las Cortaderas)	Mapusaurus roseae	Coria and Currie, 1997	incomplete skeleton and teeth	1	Terrestrial	not reported	39.1° S	69.3° W	Huincul	Late Cretaceous	Late Cenomanian	Turonian
	DB 88181			El Anfiteatro, Parrita site	cf. Carcharodontosauridae indet.	de la Fuente et al., 2008	isolated teeth associated with a sauropod skeleton	1	Terrestrial	not reported	39.3° S	68.4° W	Plottier	Late Cretaceous	Late Coniacian	Early Santonian	[16]
Brazil (SA)	DB 56365**			Laje do Coringa, Ilha do Cajual	Carcharodontosauridae indet.	Candeiro and Martinelli, 2005; Medeiros and Schultz, 2002	isolated teeth and vertebra	2	Coastal	sandstone and conglomerate	2.5° S	44.5° W	Alcântara	Early Cretaceous	Late Albian	Early Cenomanian	[17]
	(Based on DB 118187)**			Itapecuru-Mirim (Added)			isolated teeth	2	Coastal	not reported	3.4° S	44.4° W	Undifferentiated Unit	Early Cretaceous	Albian	Albian	[18]
	DB 56997*	4	X	Florida Paulista - Fazenda Nelson Tarnorches		Candeiro et al., 2004; Torres et al., 2003; Furtado et al., 2013	Isolated teeth	2	Terrestrial	tabular, fine-grained, red, yellow sandstone and red, yellow, conglomeratic sandstone	21.6° S	51.2° W	Adamantina	Late Cretaceous	Turonian	Santonian
	DB 57003*	4	X	Alfredo Marcondes outcrop	Carcharodontosauridae indet.	Azevedo et al. 2013; Torres et al., 2003	fragmentary right maxilla and tooth	2	Terrestrial	fine-grained, red, conglomeratic sandstone	21.9° S	51.4° W	Adamantina	Late Cretaceous	Turonian	Santonian
	DB 61578*	4	X	Serra de Boa Vista	Carcharodontosauridae indet.	Candeiro et al., 2006; Candeiro et al., 2006	isolated tooth	2	Terrestrial	bioturbated, fine-grained, medium, red sandstone and conglomerate	19.5° S	49.2° W	Adamantina	Late Cretaceous	Turonian	Santonian
	DB 64133*		X	Peirópolis site	cf. Carcharodontosauridae indet.	Candeiro et al., 2012; Santucci and Bertini, 2001	Isolated teeth	2	Terrestrial	white, yellow, conglomeratic sandstone and mudstone	19.6° S	47.6° W	Serra da Galga Member (Marília Formation)	Late Cretaceous	Late Maastrichtian	Late Maastrichtian
China (AS)	DB 49817			Wuerho, IVPP site 64043	Kelmayisaurus petrolicus	Dong, 1973	incomplete skull	1	Terrestrial	gray, sandy mudstone and gray, green sandstone	46.1° N	85.7° E	Lianmugin	Early Cretaceous	Late Aptian	Albian
	DB 66924			Maortu	Shaochilong maortuensis	Hu, 1964.	incomplete skeleton	1	Terrestrial	not reported	40.3° N	105.9° E	Ulansuhai	Late Cretaceous	Turonian	Turonian
	DB 117983**	5		Shijiagou quarry, Liudian	Carcharodontosauridae indet.	Lü et al., 2009	isolated teeh	2	Terrestrial	brown, red, silty mudstone	34.1° N	112.6° E	Mangchuan	Late Cretaceous	Cenomanian	Turonian
	DB 117986	5		Haoling Village, Liudian Town	Carcharodontosauridae indet.	Lü et al., 2009	isolated teeth	2	Terrestrial	brown, red, silty mudstone	34.1° N	112.6° E	Mangchuan	Late Cretaceous	Cenomanian	Turonian
	DB 154688**		X	Paimang	Carcharodontosauridae indet.	Mo et al., 2014	Isolated tooth	2	Terrestrial	not reported	22.1° N	108.2° E	Xinlong	Early Cretaceous	Aptian	Aptian
Egypt (Af)	DB 25126	6		Ain Gedid, Gebel Harra	Carcharodontosaurus saharicus	Stromer, 1931	Incomplete skeleton and teeth	1	Terrestrial	lithified marl	28.3° N	29.1° E	Baharîja	Late Cretaceous	Early Cenomanian	Early Cenomanian
	DB 25127**	6		Gebel el Dist (Spinosaurus type)	? Carcharodontosaurus saharicus	Stromer, 1915	isolated teeth	2	Terrestrial	gray, yellow sandstone and ferruginous sandstone	28.4° N	28.9° E	Baharîja	Late Cretaceous	Early Cenomanian	Early Cenomanian
	DB 47136	6	X	BDP 2000-18	cf. Carcharodontosaurus sp.	Smith et al., 2001	one tooth	2	Terrestrial	poorly lithified, brown shale	28.3° N	29.0° E	Baharîja	Late Cretaceous	Cenomanian	Cenomanian
	DB 51748	6		Ain Murûn	Sigilmassasaurus brevicollis	Stromer, 1934	vertebrae	2	Terrestrial	lithology not reported	28.4° N	28.9° E	Baharîja	Late Cretaceous	Early Cenomanian	Early Cenomanian
	DB 51751	6		Gebel Harra	Sigilmassasaurus brevicollis	Stromer, 1934	vertebrae	2	Terrestrial	gypsiferous, gray claystone	28.3° N,	29.1° E	Baharîja	Late Cretaceous	Early Cenomanian	Early Cenomanian
	DB 54083**		X	Bee's Friday Site, Dakhleh Oasis	Carcharodontosaurus sp.	Churcher and Russell, 1992	?	?	Coastal	shale	25.6° N	29.3° E	Mut	Late Cretaceous	Campanian	Campanian
France (Eu)	DB 77231	7		La Buzinie roadworks (=Angoulême)	? Carcharodontosauridae indet.	Vullo et al., 2007	Isolated fragmentary teeth	2	Coastal	glauconitic sandstone	45.7° N	0.2° W	Lower Cenomanian B2 subunit	Late Cretaceous	Early Cenomanian	Early Cenomanian
	DB 77229	7	X	Montagan roadworks (=Jarnac)	? Carcharodontosauridae indet.	Vullo et al., 2007	Isolated fragmentary teeth	2	Coastal	glauconitic sandstone	45.6° N	0.2° W	Lower Cenomanian B2 subunit	Late Cretaceous	Early Cenomanian	Early Cenomanian
	DB 77230	7	X	Traslemaine roadworks (=Angoulême)	? Carcharodontosauridae indet.	Vullo et al., 2007	Isolated fragmentary teeth	2	Coastal	glauconitic sandstone	45.7° N	0.2° W	Lower Cenomanian B2 subunit	Late Cretaceous	Early Cenomanian	Early Cenomanian
	DB 77232	7	X	Vauban cliff, Fouras-Vauban	? Carcharodontosauridae indet.	Vullo et al., 2007	Isolated fragmentary teeth	2	Coastal	mudstone	46.0° N	1.1° W	Lower Cenomanian B2 subunit	Late Cretaceous	Early Cenomanian	Early Cenomanian
	DB 77233		X	Les Renardières quarry	? Carcharodontosauridae indet.	Vullo et al., 2007; Buffetaut et al., 1991	Isolated fragmentary teeth	2	Coastal	sandstone	46.0° N	0.8° W	Lower Cenomanian B1 subunit	Late Cretaceous	Early Cenomanian	Early Cenomanian
Morocco (Af)	FW 13274**			Hamada du Guir	Carcharodontosaurus sp.	Buffetaut, 1989	isolated teeth	2	Terrestrial	red siliciclastic sediments	30.9° N	4.0° W	Tegana?	Early Cretaceous	Late Albian	Early Cenomanian
	DB 25325			Er Remlia, Gara es Sbaa	Carcharodontosaurus saharicus	Sereno et al., 1996	Incomplete skeleton	2	Terrestrial	lithified, bioturbated, red, yellow sandstone and lithified, burrowed, pebbly, red sandstone	30.3° N	4.8° W	Aoufous	Late Cretaceous	Early Cenomanian	Early Cenomanian
	DB 52887***	8		Tafilalt	"Sigilmassasaurus sp." = Carcharodontosaurus, Sigilmassasaurus brevicollis n. gen. n. sp., Carcharodontosaurus saharicus	Russell, 1996	Incomplete skeleton	2	Terrestrial	red sandstone	30.9° N	4.0° W	Kem Kem	Early Cretaceous	Albian	Cenomanian
	DB 141307***	8		5km northeast of Taouz	cf. Carcharodontosauridae indet.	Richter et al., 2013	Isolated teeth	2	Terrestrial	red sandstone	30.9° N	3.9° W	Kem Kem	Late Cretaceous	Early Cenomanian	Early Cenomanian
	DB 135639	8		Southeast region of Taouz	Sauroniops pachytholus	Cau et al., 2012	Isolated left frontal	2	Terrestrial	lithology not reported	30.9° N	4.0° W	Ifezouane	Late Cretaceous	Cenomanian	Cenomanian
Niger (Af)	DB 25194	9		El Rhaz (Lapparent site 12a, Elrhaz)	Carcharodontosaurus saharicus	Lapparent, 1960	Isolated teeth and post-cranial remains	2	Terrestrial	sandstones	16.6° N	9.5° E	Elrhaz	Early Cretaceous	Aptian	Aptian
	DB 25197	9	X	34 km southwest of El Rhaz	Carcharodontosaurus saharicus	Lapparent, 1960	Isolated tooth	2	Terrestrial	sandstones	16.4° N	9.2° E	Elrhaz	Early Cretaceous	Albian	Albian
	DB 25195	9		southwest of Egaro (Lapparent site 12d, El Rhaz)	Carcharodontosaurus saharicus	Lapparent, 1960	Isolated tooth and vertebra	2	Terrestrial	sandstones	16.1° N	10.2° E	Elrhaz	Early Cretaceous	Albian	Albian
	DB 81086*	9		G138 (Kryptops type)	Carcharodontosauridae indet., ? Eocarcharia dinops	Sereno and Brusatte, 2008	Incomplete skull and isolated teeth	1	Terrestrial	lithology not reported	16.4° N	9.1° E	Elrhaz	Early Cretaceous	Aptian	Albian
	DB 81087	9		G88 (Eocarcharia type)	Eocarcharia dinops n. gen. n. sp.	Sereno and Brusatte, 2008	Incomplete skull and isolated teeth	1	Terrestrial	lithology not reported	16.3° N	9.1° E	Elrhaz	Early Cretaceous	Aptian	Albian
	DB 25221	10		In Abangarit-Tasmena (Lapparent site 18)	Carcharodontosaurus saharicus	Lapparent, 1953	Isolated teeth and bones	2	Terrestrial	sandstone and claystone	17.7° N	5.8° E	Tegama Group	Early Cretaceous	Early Albian	Early Cenomanian
	DB 58577***	10		Iguidi (Abangarit)	Carcharodontosaurus iguidensis n. sp.	Brusatte and Sereno, 2007; Sereno et al., 2004	Incomplete skull, teeth and 1 cerviacal vertebra	1	Terrestrial	lithology not reported	17.9° N	5.6° E	Echkar	Late Cretaceous	Cenomanian	Cenomanian
	DB 25226			Oued Timmersöi (Lapparent site 22a)	Carcharodontosaurus saharicus	Lapparent, 1959	Isolated vertebrae	2	Terrestrial	lithology not reported	19.3° N	6.4° E	Irhazer Group	Early Cretaceous	Early Berriasian	Late Barremian
	DB 25355			Oued Baouet (Lapparent site 25a)	Carcharodontosaurus saharicus	Lapparent, 1960	Isolated vertebrae	2	Terrestrial	sandstone	18.0° N	9.5° E	Continental Intercalaire	Early Cretaceous	Early Berriasian	Early Cenomanian
Spain (Eu)	FW 28006			Las Hoyas Unit 3	Concavenator corcovatus	Ortega et al., 2010; Sanz et al., 1988	Almost complete skeleton	1	Terrestrial	large; limestone and packstone	40.1° N	1.9° E	La Huérguina	Early Cretaceous	Late Barremian	Late Barremian
	DB 45148		X	Tejería Beltrán/ Tejería Azuvi	? Carcharodontosauridae indet.	Canudo and Ruiz-Omeñaca, 2003; Santafé et al., 1981	isolated tooth	2	Terrestrial	fine-grained, ferruginous, micaceous, gray, green, argillaceous, conglomeratic sandstone	40.6° N	0.1° W	Arcillas de Morella	Early Cretaceous	Early Aptian	Early Aptian
	DB 53921**			La Cantalera, Josa	? Carcharodontosauridae indet.	Canudo et al., 2010; Ruiz-Omeñaca et al., 1997	Isolated teeth	2	Coastal	paleosol/pedogenic, gray, carbonaceous claystone	41.0° N	0.8° W	Blesa	Early Cretaceous	Late Hauterivian	Early Barremian
	DB 132494			Algora vertebrate site	Carcharodontosauridae indet.	Torices et al., 2012.	Isolated teeth	2	Terrestrial	medium-grained, coarse, ferruginous sandstone	41.0° N	2.7° W	Utrillas	Late Cretaceous	Middle Cenomanian	Late Cenomanian
	DB 157897			Teruel Province	Carcharodontosauridae	Gasca et al, 2014	Distal femur	2	Coastal	coarse-grained sandstone	40.9° N	0.2° W	Mirambel	Early Cretaceous	Early Barremian	Early Barremian
Sudan (Af)	DB 38682			Wadi Abu Hashim	Carcharodontosauridae indet. ?Carcharodontosauridae indet.	Buffetaut et al., 1990	isolated post-cranial elements	2	Terrestrial	coarse-grained sandstone and fine-grained siltstone	16.7° N	31.1° E	Wadi Milk	Late Cretaceous	Cenomanian	Cenomanian	[19]
Tunisia (Af)	DB 25200	11		Djebbel el Haddada (Lapparent site 14b)	Carcharodontosaurus saharicus	Lapparent, 1951	isolated teeth	2	Terrestrial	pebbly, sandy sandstone and claystone	33.0° N	10.3° E	Continental Intercalaire	Early Cretaceous	Early Albian	Early Cenomanian
	DB 67203**	11		Bir Miteur	Carcharodontosaurus saharicus	Bouaziz et al., 1988	isolated teeth	2	Terrestrial	sandy carbonate	33.2° N	10.3° E	Radouane Member (Chenini Formation)	Early Cretaceous	Early Albian	Early Albian
U.S.A. (NA)	FW 14392	12	X	McLeod Prison (OMNH V706), Tomato Hill	Acrocanthosaurus sp.	Brinkman et al., 1998; Cifelli, 1997	isolated partial tooth	2	Terrestrial	concretionary, gray, green, red claystone and poorly lithified, lenticular, brown, yellow sandstone	34.4° N	96.1° W	Middle Member (Antlers Formation)	Early Cretaceous	Late Aptian	Early Albian
	DB 25148	12		Arnold farm (Acrocanthosaurus paratype site)	Acrocanthosaurus atokensis	Stovall and Langston, Jr., 1950	Incomplete postcranial skeleton	1	Terrestrial	gray, yellow sandstone and gray claystone	34.2° N	95.8° W	Antlers	Early Cretaceous	Aptian	Aptian
	DB 25149	12		Cochran farm (Acrocanthosaurus holotype site)	Acrocanthosaurus atokensis	Stovall and Langston, Jr., 1950	Incomplete skull and postcranial skeleton	1	Terrestrial	brown, red, sandy shale	34.2° N	95.8° W	Antlers	Early Cretaceous	Aptian	Aptian
	DB 25147	12		McCurtain County theropod site	Acrocanthosaurus atokensis	Currie and Carpenter, 2000	incomplete skeleton	1	Terrestrial	lithology not reported	34.2° N	94.8° W	Antlers	Early Cretaceous	Aptian	Aptian
	DB 51709			Hobson Ranch, SMU locality 261	Acrocanthosaurus atokensis	Harris, 1998	Incomplete skeleton and teeth	1	Terrestrial	concretionary, cherty/siliceous sandstone	32.7° N	97.8° W	Twin Mountains	Early Cretaceous	LateAptian	LateAptian
	DB 90926			Cherokee-Sanford Brick Clay Pit (=Hotton locality)	cf. Acrocanthosaurus sp.	Lipka, 1998	incomplete teeth	2	Terrestrial	gray, red claystone	39.0° N	76.1° W	Patuxent	Early Cretaceous	LateAptian	LateAptian
	*Shared with Abelisauridae
	**Shared with Spinosauridae
	***Shared by all

## Sheet: Spinosauridae
Country (Continent)	Collection number (PaleoDB)	Possible paralogies	Dubious occurrences	Location	Taxon	References in PBDB	Fossil Record	Taphonomic category	Paleoenvironment	Lithology	Latitude	Longitude	Formation	Epoch	Earliest stage	Latest stage	Additional References
Algeria (Af)	DB59578 (Modified)			Gara Samani (Added)	cf. Spinosaurus maroccanus	Taquet and Russell, 1998	Incomplete articulated skull	1	Terrestrial	-	29.7° N	1.9° E	Continental Intercalaire	Early Cretaceous	Albian	Albian
Argentina (SA)	DB 61237**		X	El Anfiteatro		Canudo et al., 2004	Isolated tooth	2	Terrestrial	red claystone and medium-grained, green, yellow sandstone	39.3° S	68.5° W	Cerro Lisandro	Late Cretaceous	Middle Turonian	Late Turonian	[20]
Australia (Aus)	DB 118946			Eric the Red West ('Crayfish Bay')		Barrett et al., 2011	Isolated cervical vertebra	2	Terrestrial	conglomeratic sandstone	38.9° S	143.5° E	Eumeralla	Early Cretaceous	Late Aptian	Early Albian
Brazil (SA)	DB 28052	1		Buxexé, Santana do Cariri	Irritator	Martill et al., 1996	Incomplete articulated skull	1	Coastal	mudstone and concretionary limestone	7.2° S	39.3° W	Romualdo Formation	Early Cretaceous	Albian	Albian	[21]
	DB 51693	1		Angaturama type	Angaturama	Kellner and Campos, 1996	Incomplete articulated skull	1	Coastal	mudstone and concretionary limestone	7.2° S	39.3° W	Romualdo Formation	Early Cretaceous	Albian	Albian
	DB 67712	1		Santana do Cariri		Bittencourt and Kellner, 2004; Martins-Neto and Kellner, 1988	Articulated sacrocaudal vertebrae	1	Coastal	concretionary, calcareous shale	7.2° S	39.7° W	Romualdo Formation	Early Cretaceous	Early Albian	Early Albian
	-	1	X	Romualdo Formation (Added)			Incomplete post-cranial skeleton	1	Coastal	-	7.2° S	39.7° W	Romualdo Formation	Early Cretaceous	Early Albian	Early Albian	[22]
	-	1	X	Romualdo Formation 2 (Added)			Crown embedded in a pterosaur vertebra	2	Coastal	-	7.2° S	39.7° W	Romualdo Formation	Early Cretaceous	Early Albian	Early Albian	[23]
	DB 56365			Laje do Coringa	Spinosauridae, Oxalaia	Kellner et al., 2011; Medeiros, 2006; Medeiros and Schultz, 2002	Teeth, vertebra and partial articulated skull	1	Coastal	sandstone and conglomerate	2.5° S	44.5° W	Alcântara	Late Cretaceous	Late Albian	Early Cenomanian	[24]
	(Based on DB 118187)**			Itapecuru-Mirim (Added)			isolated teeth	2	Coastal	not reported	3.4° S	44.4° W	Undifferentiated Unit	Early Cretaceous	Albian	Albian	[18]
Cameroon (Af)	DB 38918		X	KB-6, Koum Basin	?Spinosaurinae, Spinosaurus sp.	Flynn et al., 1987	Isolated teeth	2	Terrestrial	coarse-grained sandstone and paleosol/pedogenic, concretionary, calcareous mudstone	8.3° N	14.8° E	Koum	Early Cretaceous	Aptian	Albian	[25, 26, 27]
China (As)	DB 24901	2		Liubang	"Sinopliosaurus"	Buffetaut et al., 2008; Hou et al., 1975	Isolated teeth	2	Terrestrial	red mudstone and red sandstone	22.6° N	107.9° E	Napai	Early Cretaceous	-	-
	DB 154688**	2	X	Paimang	"Sinopliosaurus"	Mo et al., 2014	Isolated tooth	2	Terrestrial	not reported	22.1° N	108.2° E	Xinlong	Early Cretaceous	Aptian	Aptian
	DB 154687	2	X	Shangying quarry	"Sinopliosaurus"	Mo et al., 2014	Isolated teeth	2	Terrestrial	not reported	22.1° N	108.2° E	Xinlong	Early Cretaceous	Aptian	Aptian
	-	2	X	West of Liubang (Added)		Mo et al., 2014	Isolated teeth	2	Terrestrial	not reported	22.1° N	108.2° E	Xinlong	Early Cretaceous	Aptian	Aptian
	DB 97943		X	Sanlimiao	Baryonychinae	Hone et al., 2010	Isolated tooth	2	Terrestrial	siltstone and calcareous sandstone	33.3° N	111.5° E	Majiacun	Late Cretaceous	Middle Santonian	Middle Santonian
	DB 117983**		X	Shijiagou village		Lü et al., 2009	Isolated crown	2	Terrestrial	brown, red, silty mudstone	34.1° N	112.6° E	Mangchuan	Late Cretaceous	Cenomanian	Turonian
Egypt (Af)	DB 25127**	3		Gebel el Dist	Spinosaurus	Stromer, 1915	Disarticulated incomplete skeleton	1	Terrestrial	gray, yellow sandstone and ferruginous sandstone	28.4° N	28.9° E	Baharîje	Late Cretaceous	Early Cenomanian	Early Cenomanian
	DB 49330	3	X	Gebel Maisara, south slope	Spinosaurus sp.	Stromer, 1915	Disarticulated postcranial remains and teeth	1	Terrestrial	gray, yellow sandstone and ferruginous sandstone	28.4° N	28.9° E	Baharîje	Late Cretaceous	Early Cenomanian	Early Cenomanian
	DB 54083**	4	X	Bee's Friday Site, Dakhleh Oasis	cf. Spinosaurus sp.	Churcher and Russell, 1992	?	?	Coastal	shale	25.6° N	29.3° E	Mut	Late Cretaceous	Campanian	Campanian	[28]
	DB 97761	4	X	Lungfish Bluff, Wadi el-Battikh	cf. Spinosaurus sp.	Churcher and De Iuliis, 2001	?	?	Coastal	shale	25.5° N	29.5° E	Mut	Late Cretaceous	Campanian	Campanian
Japan (As)	DB 87522		X	Ichinose Bridge, Nakazato	"Siamosaurus"	Hasegawa et al., 2003	Isolated tooth	2	Marine	not reported	36.1° N	138.8° E	Sebayashi	Early Cretaceous	Late Barremian	Aptian	[29]
Kenya (Af)	DB 135809		X	Lokitaung Gorge	cf. Spinosaurus sp.	Harris and Russell, 1986	?	?	Terrestrial	sandstone	4.3° N	35.8° E	Lubur Sandstone	Early Cretaceous	-	-	[3, 29]
Laos (As)	DB 131833			Ban Kalum, Tang Vay	Ichthyovenator	Allain et al., 2012	Partially articulated incomplete skeleton	1	Terrestrial	not reported	16.3° N	105.7° E	Grès supérieurs	Early Cretaceous	Aptian	Aptian
Libya (Af)	DB 110504			Jawsh quarry	Baryonychinae	Le Loeuff et al., 2010	Isolated teeth	2	Coastal	sandstone	32.0° N	11.7° E	Cabao	Early Cretaceous	Hauterivian	Barremian
Morocco (Af)	FW 13274**	5		Hamada du Guir	Spinosaurus sp.	Buffetaut, 1989	Isolated jaw fragments and an isolated tooth	2	Terrestrial	red siliciclastic sediments	30.9° N	4.0° W	Tegana?	Early Cretaceous	Late Albian	Early Cenomanian	[25, 30]
	-	5		Khouribga, 150 km of Casablanca (Added)			Isolated teeth	2	Terrestrial	coarse dark red sandstone	32.8° N	6.8° W	Tegana?	Early Cretaceous	Late Albian	Early Cenomanian	[25, 31]
	DB 52887***	6		Tafilalt	"S. marrocanus"	Russell, 1996	Isolated vertebrae anda dentary remains	2	Terrestrial	red sandstone	30.9° N	4.0° W	Kem Kem	Early/Late Cretaceous	Albian	Cenomanian
	DB 60002	6		Taouz-Hammada du Guir plateau	S. cf. aegyptiacus	Dal Sasso et al., 2005	Incomplete articulated skull	1	Terrestrial	red sandstone	30.9° N	3.9° W	Kem Kem	Late Cretaceous	Early Cenomanian	Early Cenomanian
	DB 90078	6		West of Hamada du Guir		Kellner and Mader, 1997	Isolated teeth	2	Terrestrial	coarse-grained sandstone	30.9° N	4.0° W	Kem Kem	Late Cretaceous	Cenomanian	Cenomanian	[32]
	DB 141307***	6		Near Taouz		Richter et al., 2013	Isolated teeth	2	Terrestrial	red sandstone	30.9° N	4.0° W	Kem Kem	Late Cretaceous	Cenomanian	Cenomanian
	DB 58519	6		Keneg ed Dal	S. cf. aegyptiacus	Dal Sasso et al., 2005	Eroded articulated pair of nasals	2	Terrestrial	not reported	30.0° N	5.2° W	Kem Kem	Late Cretaceous	Early Cenomanian	Early Cenomanian
	-	6		18 km northeast from Erfoud (Added)	Spinosaurus		Partial postcranial skeleton	1	Terrestrial	fluvial sandstone	31.4° N	4.2° W	Kem Kem	Late Cretaceous	Cenomanian	Cenomanian	[33]
Niger (Af)	DB 37200	7		Gadoufaoua dinosaur site	Cristatusaurus	Taquet, 1984	Articulated skull fragments and isolated vertebrae	1	Terrestrial	not reported	16.6° N	9.3° E	Elrhaz	Early Cretaceous	Aptian	Aptian	[34, 35]
	DB 60029	7		Suchomimus type site	Suchomimus	Sereno et al., 1998	Incomplete skeleton	1	Terrestrial	medium-grained sandstone	16.4° N	9.1° E	Elrhaz	Early Cretaceous	Aptian	Albian
	DB 58577***			Iguidi	?Spinosaurus sp.	Brusatte and Sereno, 2007; Sereno et al., 2004	Isolate teeth	2	Terrestrial	not reported	17.9° N	5.6° E	Echkar	Late Cretaceous	Cenomanian	Cenomanian
Portugal (Eu)	DB 49255			Boca do Chapim	"Suchosaurus"	Buffetaut, 2007; Sauvage, 1986	Incomplete skeleton and isolated teeth and jaw fragments	1 (but see Mateus et al., 2011)	Coastal	sandstone	38.4° N	9.2° W	Papo Seco	Early Cretaceous	Early Barremian	Early Barremian	[36]
Spain (Eu)	DB 28196			Vallipón, Castellote	Baryonychinae	Ruiz-Omeñaca and Canudo, 2001; Ruiz-Omeñaca et al., 1996	Isolated teeth	2	Coastal	lithified, calcareous sandstone and conglomerate	40.8° N	0.3° W	Artoles	Early Cretaceous	Late Barremian	Late Barremian	[37]
	FW 36368	8		Cerrada Roya	Spinosaurinae	Sánchez-Hernández et al., 2007; Sanz et al., 1987	Isolated teeth	2	Terrestrial	mudstone and sandstone	40.6° N	0.9° W	Camarillas	Early Cretaceous	Early Barremian	Early Barremian
	DB 89275	8		Poca (=Galve)	Baryonychinae	Sánchez- Hernández et al., 2007; Canudo and G. Cuenca-Bescós, 1996	Isolated teeth	2	Terrestrial	quartzose claystone	40.6° N	0.9° W	Camarillas	Early Cretaceous	Early Barremian	Early Barremian
	DB 59075	8		San Cristóbal, Teruel (CT-28)	Spinosaurinae	Sánchez-Hernández et al., 2007; Canudo et al., 1997	Isolated teeth	2	Terrestrial	marl	40.1° N	0.8° W	Camarillas	Early Cretaceous	Early Barremian	Early Barremian
	DB 51034	9		Tenadas de los Vallejos II		Pereda Superbiola et al., 2003	Two cervical vertebrae	2	Terrestrial	red claystone and sandstone	42.0° N	3.3° W	Castrillo de la Reina	Early Cretaceous	Late Barremian	Early Aptian
	DB 68471	9		El Oterillo II	Baryonychinae	Torcida Fernández-Baldor, 2005	Isolated teeth	2	Terrestrial	not reported	42.0° N	3.3° W	Castrillo de la Reina	Early Cretaceous	Late Barremian	Early Aptian	[38, 39]
	DB 89283 (Modified)	9	X	La Solana, Cabezón de la Sierra (Added)	Baryonychinae		Isolated crown	2	Terrestrial	-	41.9° N	3.2° W	Castrillo de la Reina	Early Cretaceous	Late Barremian	Early Aptian	[40]
	DB 131492 (Modified)	9	X	Tenadas del Jabalí (Added)	Baryonychinae		Isolated crown	2	Terrestrial	-	42.0° N	3.3° W	Castrillo de la Reina	Early Cretaceous	Late Barremian	Early Aptian	[40]
	DB 53921**		X	La Cantalera, Josa	Baryonychinae	Canudo and Ruiz-Omeñaca, 2003; Ruiz-Omeñaca et al., 1997	Isolated tooth	2	Coastal	paleosol/pedogenic, gray, carbonaceous claystone	41.0° N	0.8° W	Blesa	Early Cretaceous	Late Hauterivian	Early Barremian
	DB 59080		X	Ladruñán, LAD0	Baryonychinae	Infante et al., 2005	Isolated tooth	2	Terrestrial	sandstone	40.8° N	0.4° W	Mirambel	Early Cretaceous	Early Barremian	Early Barremian
	DB 61326	10		Cantera del Mas de la Parreta 2	Baryonychinae	Canudo et al., 2004	Isolated teeth	2	Terrestrial	green, red claystone	40.5° N	0.4° E	Arcillas de Morella	Early Cretaceous	Early Aptian	Early Aptian
	DB 61327	10		Cantera del Mas de la Parreta 3	Baryonychinae	Canudo et al., 2004	Isolated teeth and tibia	2	Terrestrial	lenticular, brown, gray conglomerate	40.5° N	0.4° E	Arcillas de Morella	Early Cretaceous	Early Aptian	Early Aptian	[41, 42]
	DB 89291	10		Cantera del Mas de la Parreta 5	Baryonychinae	Canudo et al., 2008	Isolated teeth	2	Terrestrial	claystone and sandstone	40.5° N	0.4° E	Arcillas de Morella	Early Cretaceous	Early Aptian	Early Aptian	[42]
	DB 89293	10		Cantera del Mas de la Parreta 9	Baryonychinae	Canudo et al., 2008	Isolated crowns	2	Terrestrial	red claystone	40.5° N	0.4° E	Arcillas de Morella	Early Cretaceous	Early Aptian	Early Aptian	[43, 44]
	-	10		Cantera del Mas de la Parreta (Added)	cf. Baryonychinae		Isolated cervical vertebra	2	Terrestrial	-	40.5° N	0.4° E	Arcillas de Morella	Early Cretaceous	Early Aptian	Early Aptian	[45]
	DB 61375	10		Els Ports, Morella	Baryonychinae	Ruiz-Omeñaca and Santos-Cubedo, 1998	Isolated fragmentary teeth	2	Terrestrial	micaceous, green, carbonaceous claystone	40.6° N	0.1° W	Arcillas de Morella	Early Cretaceous	Early Aptian	Early Aptian	[32]
	DB 68464		X	Tenadas de Costalomo, Burgos	cf. Baryonyx sp.	Torcida et al., 1997; Platt and Meyer, 1991	Isolated tooth	2	Terrestrial	sandstone	42.0° N	3.2° W	Pidrahita de Muñó	Early Cretaceous	Valangian	Late Barremian	[37]
	DB 84212	11	X	Senda Miravete 2	Baryonychinae	Gasca et al., 2007	Isolated tooth	2	Terrestrial	carbonaceous carbonate	40.6° N	0.7° W	El Castellar	Early Cretaceous	Late Hauterivian	Early Barremian	[46]
	DB 84213	11		Molino alto 1	Baryonychinae	Gasca et al., 2008	Isolated teeth	2	Terrestrial	carbonate	40.7° N	0.7° W	El Castellar	Early Cretaceous	Late Hauterivian	Early Barremian
	DB 96073	11	X	PX (=Pielago)	Baryonychinae	Sánchez-Hernández et al., 2007	Isolated tooth	2	Terrestrial	not reported	40.6° N	0.8° W	El Castellar	Early Cretaceous	Early Barremian	Early Barremian
	DB 89271	12	X	La Tejera-Valdesancho	cf. Baryonyx sp.	Torcida et al., 1997; Torcida Fernández-Baldor, 1996	Isolated tooth	2	Terrestrial	not reported	42.2° N	3.2° W	"Wealden facies"	Early Cretaceous	Berriasian	Aptian	[37]
	DB 89274	12		Tenada de la Rosa	cf. Baryonyx sp.	Torcida et al., 1997	Isolated teeth	2	Terrestrial	not reported	41.9° N	3.2° W	"Wealden facies"	Early Cretaceous	Berriasian	Aptian	[37]
	DB 89277			El Juguete	Baryonyx sp.	Canudo and Ruiz-Omeñaca, 2003	Disarticulated cranial and postcranial remains of a juvenile	1	Terrestrial	not reported	42.3° N	3.6° W	Pinilla de los Moros	Early Cretaceous	Late Hauterivian	Early Barremian	[47]
	DB 89278			Peña Carcena	Baryonychinae	Vieira and Torres, 1995	Maxilla without teeth	2	Coastal	carbonate	42.1° N	2.0° W	Enciso Group	Early Cretaceous	Barremian	Late Aptian	[37]
Tanzania (Af)	DB 47155		X	Tendaguru quarry Om	Ostafrikasaurus	Buffetaut, 2011; Janensch, 1925	Isolated tooth	2	Coastal	gray, green, red, sandy marl	9.7° S	39.2° E	Tendaguru (Upper Dinosaur Member)	Late Jurassic	Tithonian	Tithonian
	-		X	Tendaguru quarry Om (Added)	cf. Ostafrikasaurus		Isolated tooth	2	Coastal	-	9.7° S	39.2° E	Tendaguru (Middle Dinosaur Member)	Late Jurassic	Kimmeridgian	Kimmeridgian	[48]
Thailand (As)	DB 35973	13		Phu Wiang 1, Khon Kaen	"Siamosaurus"	Amiot et al., 2009; Buffetaut, 1983	Isolated teeth	2	Terrestrial	lithified, gray, green, red siltstone and fine-grained, green sandstone	16.7° N	102.3° E	Sao Khua	Early Cretaceous	Barremian	Aptian
	DB 35974	13		Phu Wiang 1A, Khon Kaen	"Siamosaurus"	Buffetaut and Ingavat, 1986; Buffetaut and Ingavat, 1983	Isolated teeth	2	Terrestrial	fine-grained, green sandstone and lithified, gray, green, red siltstone	16.7° N	102.3° E	Sao Khua	Early Cretaceous	Barremian	Aptian
	DB 36082	13	X	Phu Wiang 5A, Khon Kaen	"Siamosaurus"	Martin et al., 1999; Buffetaut et al., 1995	Isolated tooth	2	Terrestrial	red claystone and concretionary, calcareous conglomerate	16.7° N	102.3° E	Sao Khua	Early Cretaceous	Barremian	Aptian	[49]
	DB 36144	13		Phu Pum Khao, K4 (Wat Sakawan), Kalasin	"Siamosaurus"	Buffetaut and Suteethorn, 1999; Buffetaut, 1983	Isolated teeth associated to a sauropod skeleton	1	Terrestrial	lithified sandstone and siltstone	16.7° N	103.6° E	Sao Khua	Early Cretaceous	Barremian	Aptian	[50]
	DB 84443	13		Khok Kong	"Siamosaurus"	Amiot et al., 2009; Buffetaut et al., 2005	Isolated teeth	2	Terrestrial	red siltstone	16.8° N	103.7° E	Sao Khua	Early Cretaceous	Barremian	Aptian
	DB 79489	13		Phu Phok	"Siamosaurus"	Lauprasert et al., 2007; Buffetaut et al., 2005	Isolated teeth	2	Terrestrial	concretionary, pebbly, brown, red siltstone	16.9° N	104.1° E	Sao Khua	Early Cretaceous	Barremian	Aptian
	DB 52346	14		Khok Pha Suam		Buffetaut et al., 1997	Isolated teeth	2	Terrestrial	not reported	15.2° N	104.9° E	Khok Kruat	Early Cretaceous	Aptian	Albian	[51]
	DB 93887	14		Phu Hin Rong, Khon Kaen		Buffetaut et al., 2007	Isolated teeth	2	Terrestrial	red siltstone	16.4° N	102.8° E	Khok Kruat	Early Cretaceous	Aptian	Albian
	-	14	X	Near Khon Kaen (Added)			Incomplete post-cranial skeleton	1	Terrestrial	not reported	-	-	Khok Kruat	Early Cretaceous	Aptian	Albian	[51, 52]
Tunisia (Af)	DB 32322	15		Ouaja, Jebel Miteur	S. cf. aegyptiacus	Buffetaut and Ouaja, 2002	Partial left dentary	2	Terrestrial	sandstone and limestone	33.2° N	10.3° E	Chenini	Early Cretaceous	Early Albian	Early Albian
	DB 67203**	15		Bir Miteur, RH 45, Jebel Miteur	Spinosaurus sp.	Bouaziz et al., 1988	Isolated teeth	2	Terrestrial	sandy carbonate	33.2° N	10.3° E	Chenini (Radouane Member)	Early Cretaceous	Early Albian	Early Albian
United Kindom (Eu)	DB 45193	16		Smokejacks Brickworks	Baryonyx	Charig and Milner, 1986	Incomplete skeleton and isolated teeth	1	Terrestrial	lithified, bioturbated, fine-grained, concretionary, gray, green, sandy claystone and lithified, sideritic siltstone	51.1° N	0.3° E	Weald Clay	Early Cretaceous	Early Barremian	Early Barremian
	DB 45194	16	X	Ewhurst Brickworks	cf. Baryonyx	Charig and Milner, 1997	Isolated crown	2	Terrestrial	not reported	51.1° N	0.4° E	Weald Clay	Early Cretaceous	Late Barremian	Early Aptian
	DB 45195		X	Redlands Brick, Bexhill-on-Sea	cf. Baryonyx	Charig and Milner, 1997	Isolated crown	2	Terrestrial	not reported	50.9° N	0.5° E	Ashdown	Early Cretaceous	Early Berriasian	Early Valangian
	DB 53886	17	X	Yaverland Battery south, Isle of Wight	Baryonychinae	Jackson, 1931	Isolated crown	2	Terrestrial	not reported	50.7° N	1.1° W	Wessex	Early Cretaceous	Late Hauterivian	Early Barremian	[53]
	DB 53888	17	X	Hanover Point theropod tooth, Isle of Wight	Baryonychinae	Martill and Hutt, 1996	Isolated crown	2	Terrestrial	not reported	50.7° N	1.5° W	Wessex	Early Cretaceous	Late Hauterivian	Early Barremian
	DB 96621			Pevensey Pit, Ashdown Brickworcks	Baryonyx sp.	Austen et al., 2010	Isolated teeth	2	Terrestrial	conglomeratic claystone and siltstone	50.9° N	0.4° E	Tunbridge Wells Sand (Lower Member)	Early Cretaceous	Late Valangian	Late Valangian	[54]
	(based on DB 52258)			Tilgate Forest/ Cuckfield after Mantell, 1822 (Added)	"Suchosaurus"		Isolated teeth	2	Terrestrial	not reported	51.1° N	0.2° W	Tilgate Grit Member (Grinstead Clay Formation)	Early Cretaceous	Late Valangian?	Late Valangian?	[25, 55, 56]
United States (NA)	DB 25141		X	Calico Gulch Dinosaur Quarry		Allain et al., 2012; Galton and Jensen, 1975	Isolated ungueal	2	Terrestrial	not reported	40.5° N	108.4° W	Morrison	Late Jurassic	Kimmeridgian	Tithonian
	*Shared with Abelisauridae
	**Shared with Carcharodontosauridae
	***Shared by all

## Sheet: All localities
Country (Continent)	Collection number (PaleoDB)	Possible paralogies	Dubious occurrences	Taxon	Location	Paleoenvironment	Lithology	Latitude	Longitude	Formation	Epoch	Earliest stage	Latest stage
Algeria (Af)	DB 25137	1		C	south of Alrar	Terrestrial	not reported	28.5° N	9.6° E	Continental Intercalaire	Early Cretaceous	Early Berriasian	Late Albian
	DB 25139	1		C	Foggara Ben Draou, Aoulef Cheurfa	Terrestrial	not reported	27.0° N	1.1° E	Continental Intercalaire	Early Cretaceous	Early Berriasian	Late Albian
	DB 25192	1	X	C	Djoua Valley, 120 km east of Fort Flatters	Terrestrial	not reported	28.2° N	8.2° E	Continental Intercalaire	Early Cretaceous	Early Albian	Early Cenomanian
	DB 59578 (Modified)	1		S	Gara Samani (Added)	Terrestrial	-	29.7° N	1.9° E	Continental Intercalaire	Early Cretaceous	Albian	Albian
	DB 59689	1		C	2 km from Timimoun	Terrestrial	not reported	29.3° N	0.3° E	Continental Intercalaire	Early Cretaceous	Albian	Albian
	DB 59690	1		C	5 km from Timimoun	Terrestrial	not reported	29.3° N	0.3° E	Continental Intercalaire	Early Cretaceous	Albian	Albian
Argentina (SA)	DB 13209		X	C	Arroyo El Morterito	Terrestrial	lithified, micaceous, gray, red, conglomeratic sandstone and lithified, pebbly, gray, green, calcareous sandstone	24.3° S	65.3° W	Los Blanquitos	Late Cretaceous	Campanian	Campanian
	DB 25534			A	Estancia Pocho Sastre	Coastal	concretionary, hematitic siliciclastic sediments	43.0° S	67.5° W	La Colonia	Late Cretaceous	Campanian	Campanian
	DB 28458	2		A	Aguada Grande	Terrestrial	not reported	39.2° S	69.2° W	Huincul	Late Cretaceous	Late Cenomanian	Turonian
	DB 85501	2		A	Bustingorry's farm	Terrestrial	sandstone	39.2° S	68.8° W	Huincul	Late Cretaceous	Late Cenomanian	Turonian
	DB 28459		X	A	Salitral Ojo de Agua	Terrestrial	-	39.5° S	67.4° W	Allen	Late Cretaceous	Late Campanian	Early Maastrichtian
	DB 28460	3		C	15 km from El Chocón (Giganotosaurus type)	Terrestrial	not reported	39.5° S	68.8° W	Candeleros	Late Cretaceous	Early Cenomanian	Early Cenomanian
	DB 51944	3		C	Los Candeleros	Terrestrial	not reported	39.2° S	69.6° W	Candeleros	Late Cretaceous	Early Cenomanian	Early Cenomanian
	DB 51945	3	X	C	Villa El Chocón	Terrestrial	not reported	39.2° S	68.7° W	Candeleros	Late Cretaceous	Early Cenomanian	Early Cenomanian
	DB 28461	4		A	Auca Mahuevo	Terrestrial	small; gray, green mudstone and sandstone	37.9° S	68.5° W	Anacleto	Late Cretaceous	Early Campanian	Middle Campanian
	DB 32339	4		A	Cantera de la Pala Mécanica	Terrestrial	medium-grained, coarse, yellow sandstone	38.8° S	68.0° W	Anacleto	Late Cretaceous	Early Campanian	Middle Campanian
	DB 38529	5		C	La Juanita Estancia, Cerro Barcino	Terrestrial	not reported	43.8° S	68.8° W	Cerro Castaño Member (Cerro Barcino Formation)	Early Cretaceous	Aptian	Aptian
	DB 38531	5		C	Leaellyn's site 3 (Chubut Locality 1997-1)	Terrestrial	not reported	43.8° S	68.6° W	Cerro Castaño Member (Cerro Barcino Formation)	Early Cretaceous	Aptian	Aptian
	DB 38533		X	C	Cerro Barcino (Chubutisaurus type)	Terrestrial	intraclastic, gray, green siliciclastic sediments	43.4° S	68.3° W	Bayo Overo Member (Cerro Barcino Formation)	Early Cretaceous	Albian	Cenomanian
	DB 38952	6		A	6 km north of Estancia "Ocho Hermanos"	Terrestrial	sandstone	45.3° S	69.6° W	Bajo Barreal (Lower Member)	Late Cretaceous	Late Cenomanian	Early Turonian
	DB 49099	6		A	6 km north of Estancia "Ocho Hermanos" (2)	Terrestrial	sandstone	45.3° S	69.6° W	Bajo Barreal (Lower Member)	Late Cretaceous	Late Cenomanian	Early Turonian
	DB 152253	6	X	A	Estancia Laguna Palacios "2005 Quarry"	Terrestrial	lenticular, graded, coarse-grained, green sandstone	44.9° S	69.4° W	Bajo Barreal (Lower Member)	Late Cretaceous	Late Cenomanian	Early Turonian
	DB 49416	6		A	Cañadón de los Corrales	Terrestrial	not reported	47.2° S	69.7° W	Bajo Barreal	Late Cretaceous	Middle Cenomanian	Early Coniacian
	DB 49098			A	Cerro Bayo Mesa	Terrestrial	paleosol/pedogenic mudstone	39.1° S	69.2° W	Cerro Lisandro	Late Cretaceous	Middle Turonian	Late Turonian
	DB 49409			A	Bajo del Añelo, Candeleros	Terrestrial	not reported	38.0° S	69.1° W	Candeleros	Late Cretaceous	Early Cenomanian	Early Cenomanian
	DB 49415			A, C	Futalognko Quarry, Costa Dinosaurio	Terrestrial	fine-grained conglomerate and fine-grained sandstone	38.5° S	68.7° W	Portezuelo	Late Cretaceous	Late Turonian	Early Coniacian
	DB 55351			C	Cañadón del Gato (=Las Cortaderas)	Terrestrial	not reported	39.1° S	69.3° W	Huincul	Late Cretaceous	Late Cenomanian	Turonian
	DB 88181			C	El Anfiteatro, Parrita site	Terrestrial	not reported	39.3° S	68.4° W	Plottier	Late Cretaceous	Late Coniacian	Early Santonian
	DB 90788		X	A	Estancia Mallín Grande, Cerro Crettón	Terrestrial	not reported	44.9° S	69.2° W	Castillo (Upper Member)	Late Cretaceous	Cenomanian	Cenomanian
	DB 61237		X	C, S	El Anfiteatro, La Bajada sector	Terrestrial	red claystone and medium-grained, green, yellow sandston	39.3° S	68.5° W	Cerro Lisandro	Late Cretaceous	Middle Turonian	Late Turonian
Australia (Aus)	DB 118946			S	Eric the Red West ('Crayfish Bay')	Terrestrial	conglomeratic sandstone	38.9° S	143.5° E	Eumeralla	Early Cretaceous	Late Aptian	Early Albian
Brazil (SA)	DB 28052	7		S	Buxexé, Santana do Cariri	Coastal	mudstone and concretionary limestone	7.2° S	39.3° W	Romualdo Formation	Early Cretaceous	Albian	Albian
	DB 51693	7		S	Angaturama type	Coastal	mudstone and concretionary limestone	7.2° S	39.3° W	Romualdo Formation	Early Cretaceous	Albian	Albian
	DB 67712	7		S	Santana do Cariri	Coastal	concretionary, calcareous shale	7.2° S	39.7° W	Romualdo Formation	Early Cretaceous	Early Albian	Early Albian
	-	7	X	S	Romualdo Formation (Added)	Coastal	-	7.2° S	39.7° W	Romualdo Formation	Early Cretaceous	Early Albian	Early Albian
	-	7	X	S	Romualdo Formation 2 (Added)	Coastal	-	7.2° S	39.7° W	Romualdo Formation	Early Cretaceous	Early Albian	Early Albian
	DB 32335			A	Fazenda Roncador, Mato Grosso	Terrestrial	red, conglomeratic sandstone	15.5° S	54.6° W	Grupo Parecis	Late Cretaceous	Turonian	Santonian
	DB 56365			C, S	Laje do Coringa, Ilha do Cajual	Coastal	sandstone and conglomerate	2.5° S	44.5° W	Alcântara	Early Cretaceous	Late Albian	Early Cenomanian
	(Based on DB 118187)			C, S	Itapecuru-Mirim (Added)	Coastal	not reported	3.4° S	44.4° W	Undifferentiated Unit	Early Cretaceous	Albian	Albian
	DB 56997	8		A, C	Florida Paulista - Fazenda Nelson Tarnorches	Terrestrial	tabular, fine-grained, red, yellow sandstone and red, yellow, conglomeratic sandstone	21.6° S	51.2° W	Adamantina	Late Cretaceous	Turonian	Santonian
	DB 57000	8		A	Santo Anastácio, São Paulo	Terrestrial	fine-grained, red, conglomeratic sandstone	21.9° S	51.4° W	Adamantina	Late Cretaceous	Turonian	Santonian
	DB 57003	8	X	A, C	Alfredo Marcondes, São Paulo	Terrestrial	fine-grained, red, conglomeratic sandstone	21.9° S	51.4° W	Adamantina	Late Cretaceous	Turonian	Santonian
	DB 61578	8	X	A, C	Serra de Boa Vista, Prata, Minas Gerais	Terrestrial	bioturbated, fine-grained, medium, red sandstone and conglomerate	19.5° S	49.2° W	Adamantina	Late Cretaceous	Turonian	Santonian
	DB 156131	8		A	Monte Alto	Terrestrial	not reported	21.2° S	48.5° W	Adamantina	Late Cretaceous	Turonian	Santonian
	DB 64133	9		A, C	Peirópolis, Minas Gerais	Terrestrial	white, yellow, conglomeratic sandstone and mudstone	19.6° S	47.6° W	Marília (Serra da Galga Member)	Late Cretaceous	Maastrichtian	Maastrichtian
	DB 80824	9		A	Outcrop BR-050 A (km 153.5), Minas Gerais	Terrestrial	coarse-grained, intraclastic sandstone	19.6° S	48.0° W	Marília (Serra da Galga Member)	Late Cretaceous	Maastrichtian	Maastrichtian
Cameroon (Af)	DB 38918		X	S	KB-6, Koum Basin	Terrestrial	coarse-grained sandstone and paleosol/pedogenic, concretionary, calcareous mudstone	8.3° N	14.8° E	Koum	Early Cretaceous	Aptian	Albian
China (AS)	DB 24901	10		S	Liubang	Terrestrial	red mudstone and red sandstone	22.6° N	107.9° E	Napai	Early Cretaceous	-	-
	DB 154688	10	X	C, S	Paimang	Terrestrial	not reported	22.1° N	108.2° E	Xinlong	Early Cretaceous	Aptian	Aptian
	DB 154687	10	X	S	Shangying quarry	Terrestrial	not reported	22.1° N	108.2° E	Xinlong	Early Cretaceous	Aptian	Aptian
	-	10	X	S	West of Liubang	Terrestrial	not reported	22.1° N	108.2° E	Xinlong	Early Cretaceous	Aptian	Aptian
	DB 49817			C	Wuerho, IVPP site 64043	Terrestrial	gray, sandy mudstone and gray, green sandstone	46.1° N	85.7° E	Lianmugin	Early Cretaceous	Late Aptian	Albian
	DB 66924			C	Maortu	Terrestrial	not reported	40.3° N	105.9° E	Ulansuhai	Late Cretaceous	Turonian	Turonian
	DB 97943		X	S	Sanlimiao	Terrestrial	siltstone and calcareous sandstone	33.3° N	111.5° E	Majiacun	Late Cretaceous	Middle Santonian	Middle Santonian
	DB 117983	11		C, S	Shijiagou quarry, Liudian	Terrestrial	brown, red, silty mudstone	34.1° N	112.6° E	Mangchuan	Late Cretaceous	Cenomanian	Turonian
	DB 117986	11		C	Haoling Village, Liudian Town	Terrestrial	brown, red, silty mudstone	34.1° N	112.6° E	Mangchuan	Late Cretaceous	Cenomanian	Turonian
Colombia (SA)	DB 95168			A	Ortega locality, Tolima	Terrestrial	sandstone and claystone	3.9° S	75.2° W	Upper Magdalena Basin	Late Cretaceous	Maastrichtian	Maastrichtian
Egypt (Af)	DB 25126	12		C	Ain Gedid, Gebel Harra	Terrestrial	lithified marl	28.3° N	29.1° E	Baharîja	Late Cretaceous	Early Cenomanian	Early Cenomanian
	DB 25127	12		C, S	Gebel el Dist (Spinosaurus type)	Terrestrial	gray, yellow sandstone and ferruginous sandstone	28.4° N	28.9° E	Baharîja	Late Cretaceous	Early Cenomanian	Early Cenomanian
	DB 47136	12	X	C	BDP 2000-18	Terrestrial	poorly lithified, brown shale	28.3° N	29.0° E	Baharîja	Late Cretaceous	Cenomanian	Cenomanian
	DB 49330	12		S	Gebel Maisara, south slope	Terrestrial	gray, yellow sandstone and ferruginous sandstone	28.4° N	28.9° E	Baharîje	Late Cretaceous	Early Cenomanian	Early Cenomanian
	DB 51748	12		C	Ain Murûn	Terrestrial	lithology not reported	28.4° N	28.9° E	Baharîja	Late Cretaceous	Early Cenomanian	Early Cenomanian
	DB 51751	12		C	Gebel Harra	Terrestrial	gypsiferous, gray claystone	28.3° N,	29.1° E	Baharîja	Late Cretaceous	Early Cenomanian	Early Cenomanian
	DB 54083	13	X	C, S	Bee's Friday Site, Dakhleh Oasis	Coastal	shale	25.6° N	29.3° E	Mut	Late Cretaceous	Campanian	Campanian
	DB 97761	13		S	Lungfish Bluff, Wadi el-Battikh	Coastal	shale	25.5° N	29.5° E	Mut	Late Cretaceous	Campanian	Campanian
	DB 60599	14	X	A	Sciarauna-el-Ghibli	Marine	phosphorite	25.2° N	32.7° E	Duwi	Late Cretaceous	Maastrichtian	Maastrichtian
	DB 60607	14	X	A	Kosseir-el-Khadim	Marine	phosphorite	25.2° N	32.7° E	Duwi	Late Cretaceous	Maastrichtian	Maastrichtian
	DB 60608	14	X	A	Gebel Duwi	Marine	phosphorite	25.2° N	32.7° E	Duwi	Late Cretaceous	Maastrichtian	Maastrichtian
France (Eu)	DB 48849			A	La Boucharde	Terrestrial	sandstone	43.4° N	5.7° E	Unnamed Begudien beds	Late Cretaceous	Late Campanian	Early Maastrichtian
	DB 48870			A	Massecaps locality, Cruzy	Terrestrial	ferruginous claystone and sandstone	43.3° N	3.0° E	Rognacian beds (Grès à Reptiles)	Late Cretaceous	Late Campanian	Early Maastrichtian
	DB 51692			A	Porcieux	Terrestrial	coarse-grained sandstone	45.8° N	5.4° E	Unnamed Upper Rognacian beds (Grès à Reptiles)	Late Cretaceous	Maastrichtian	Maastrichtian
	DB 59887		X	A	Montplô Nord, Cruzy	Terrestrial	red marl and sandstone	43.3° N	3.0° E	-	Late Cretaceous	Late Campanian	Early Maastrichtian
	DB 77231	15		C	La Buzinie roadworks (=Angoulême)	Coastal	glauconitic sandstone	45.7° N	0.2° W	Lower Cenomanian B2 subunit	Late Cretaceous	Early Cenomanian	Early Cenomanian
	DB 77229	15	X	C	Montagan roadworks (=Jarnac)	Coastal	glauconitic sandstone	45.6° N	0.2° W	Lower Cenomanian B2 subunit	Late Cretaceous	Early Cenomanian	Early Cenomanian
	DB 77230	15	X	C	Traslemaine roadworks (=Angoulême)	Coastal	glauconitic sandstone	45.7° N	0.2° W	Lower Cenomanian B2 subunit	Late Cretaceous	Early Cenomanian	Early Cenomanian
	DB 77232	15	X	C	Vauban cliff, Fouras-Vauban	Coastal	mudstone	46.0° N	1.1° W	Lower Cenomanian B2 subunit	Late Cretaceous	Early Cenomanian	Early Cenomanian
	DB 77233		X	C	Les Renardières quarry	Coastal	sandstone	46.0° N	0.8° W	Lower Cenomanian B1 subunit	Late Cretaceous	Early Cenomanian	Early Cenomanian
	DB 89990			A	A8 motorway, Pourrières	Terrestrial	sandstone	43.5° N	5.7° E	Lower Argiles Rutilantes	Late Cretaceous	Late Campanian	Late Campanian
Hungary (Eu)	DB 48722			A	Iharkút mine, Bakony mountains	Terrestrial	sandy claystone and gray, argillaceous sandstone	47.2° N	17.6° E	Csehbánya	Late Cretaceous	Santonian	Santonian
India (In)	DB 26373	16		A	Carnosaur Bed, Bara Simla	Terrestrial	glauconitic, green sandstone	23.2° N	80.0° E	Lameta (Carnosaur Bed Member)	Late Cretaceous	Maastrichtian	Maastrichtian
	DB 34725	16		A	Temple Hill, Rahioli (cgl)	Terrestrial	calcareous, cherty/siliceous conglomerate and sandy, calcareous sandstone	23.1° N	73.3° E	Lameta	Late Cretaceous	Maastrichtian	Maastrichtian
	DB 38401	16	X	A	Temple Hill, Rahioli (ss)	Terrestrial	medium-grained, calcareous sandstone and pebbly, green, white conglomerate	23.1° N	73.3° E	Lameta Group	Late Cretaceous	Maastrichtian	Maastrichtian
	DB 95807	16		A	Rahioli Village	Terrestrial	mudstone	23.1° N	73.3° E	Lameta	Late Cretaceous	Maastrichtian	Maastrichtian
	DB 153666			A	Kallamedu Field Site	Marine	red claystone and sandstone	11.1° N	79.1° E	Kallamedu	Late Cretaceous	Maastrichtian	Maastrichtian
Japan (As)	DB 87522		X	S	Ichinose Bridge, Nakazato	Marine	not reported	36.1° N	138.8° E	Sebayashi	Early Cretaceous	Late Barremian	Aptian
Kenya (Af)	DB 135809		X	S	Lokitaung Gorge	Terrestrial	sandstone	4.3° N	35.8° E	Lubur Sandstone	Early Cretaceous
Laos (As)	DB 131833			S	Ban Kalum, Tang Vay	Terrestrial	not reported	16.3° N	105.7° E	Grès supérieurs	Early Cretaceous	Aptian	Aptian
Lybia (Af)	DB 61465	17	X	A	Nalut	Coastal	sandstone	31.9° N	11.0° E	Cabao	Early Cretaceous	Hauterivian	Barremian
	DB 110504	17		S	Jawsh quarry	Coastal	sandstone	32.0° N	11.7° E	Cabao	Early Cretaceous	Hauterivian	Barremian
Madagascar (Af)	DB 25074	18		A	MAD93-18, Mahajanga	Terrestrial	sandstone	15.9° S	46.6° E	Maevarano (Anembalemba Member)	Late Cretaceous	Maastrichtian	Maastrichtian
	DB 32366	18		A	MAD93-33, Mahajanga	Terrestrial	yellow sandstone	15.9° S	46.6° E	Maevarano (Anembalemba Member)	Late Cretaceous	Maastrichtian	Maastrichtian
	DB 39265	18		A	MAD96-01, Mahajanga	Terrestrial	white sandstone	15.9° S	46.6° E	Maevarano (Anembalemba Member)	Late Cretaceous	Maastrichtian	Maastrichtian
	DB 48389	18		A	MAD96-21, Mahajanga	Terrestrial	white sandstone	15.9° S	46.6° E	Maevarano (Anembalemba Member)	Late Cretaceous	Maastrichtian	Maastrichtian
	DB 55268	18		A	MAD93-01, Mahajanga	Terrestrial	not reported	15.9° S	46.6° E	Maevarano (Anembalemba Member)	Late Cretaceous	Maastrichtian	Maastrichtian
	DB 55270	18		A	MAD93-73, Mahajanga	Terrestrial	not reported	15.9° S	46.6° E	Maevarano (Anembalemba Member)	Late Cretaceous	Maastrichtian	Maastrichtian
	DB 55271	18		A	MAD96-07, Mahajanga	Terrestrial	not reported	15.9° S	46.6° E	Maevarano (Anembalemba Member)	Late Cretaceous	Maastrichtian	Maastrichtian
	DB 71399	18		A	south of RN4, Berivotra	Terrestrial	claystone	15.9° S	46.6° E	Maevarano (Anembalemba Member)	Late Cretaceous	Maastrichtian	Maastrichtian
	DB 84840	18		A	MAD99-33, Mahajanga	Terrestrial	not reported	15.9° S	46.6° E	Maevarano (Anembalemba Member)	Late Cretaceous	Maastrichtian	Maastrichtian
	DB 84841	18		A	MAD99-26, Mahajanga	Terrestrial	not reported	15.9° S	46.6° E	Maevarano (Anembalemba Member)	Late Cretaceous	Maastrichtian	Maastrichtian
	DB 84842	18		A	MAD93-20, Mahajanga	Terrestrial	not reported	15.9° S	46.6° E	Maevarano (Anembalemba Member)	Late Cretaceous	Maastrichtian	Maastrichtian
	DB 84843	18		A	MAD93-19, Mahajanga	Terrestrial	not reported	15.9° S	46.6° E	Maevarano (Anembalemba Member)	Late Cretaceous	Maastrichtian	Maastrichtian
	DB 84844	18		A	MAD95-14, Mahajanga	Terrestrial	not reported	15.9° S	46.6° E	Maevarano (Anembalemba Member)	Late Cretaceous	Maastrichtian	Maastrichtian
	DB 84845	18		A	MAD99-32, Mahajanga	Terrestrial	not reported	15.9° S	46.6° E	Maevarano (Anembalemba Member)	Late Cretaceous	Maastrichtian	Maastrichtian
	DB 84846	18		A	MAD01-05, Mahajanga	Terrestrial	not reported	15.9° S	46.6° E	Maevarano (Anembalemba Member)	Late Cretaceous	Maastrichtian	Maastrichtian
	DB 84847	18		A	MAD95-16, Mahajanga	Terrestrial	not reported	15.9° S	46.6° E	Maevarano (Anembalemba Member)	Late Cretaceous	Maastrichtian	Maastrichtian
	DB 84848	18		A	MAD96-18, Mahajanga	Terrestrial	not reported	15.9° S	46.6° E	Maevarano (Anembalemba Member)	Late Cretaceous	Maastrichtian	Maastrichtian
	DB 85063	18		A	MAD05-42, Mahajanga	Terrestrial	not reported	15.9° S	46.6° E	Maevarano (Anembalemba Member)	Late Cretaceous	Maastrichtian	Maastrichtian
	DB 88176	18		A	Vavaranonantsahalava	Terrestrial	not reported	15.9° S	46.6° E	Maevarano (Anembalemba Member)	Late Cretaceous	Maastrichtian	Maastrichtian
	DB 91206	18		A	MAD05-04, Mahajanga	Terrestrial	not reported	15.9° S	46.6° E	Maevarano (Anembalemba Member)	Late Cretaceous	Maastrichtian	Maastrichtian
	DB 51252	18		A	Maevarano, Betsiboka River	Terrestrial	sandstone	15.9° S	46.5° E	Maevarano	Late Cretaceous	Maastrichtian	Maastrichtian
	DB 59692	18		A	Mevarana site 2	Terrestrial	argillaceous sandstone	15.9° S	46.5° E	Maevarano	Late Cretaceous	Maastrichtian	Maastrichtian
	DB 70075	18		A	Berivotra microsite	Terrestrial	not reported	15.9° S	46.5° E	Maevarano	Late Cretaceous	Maastrichtian	Maastrichtian
	DB 102481	18		A	ravine north of Berivotra	Terrestrial	sandstone	15.9° S	46.6° E	Maevarano	Late Cretaceous	Maastrichtian	Maastrichtian
Morocco (Af)	FW 13274	19		C, S	Hamada du Guir	Terrestrial	red siliciclastic sediments	30.9° N	4.0° W	Tegana?	Early Cretaceous	Late Albian	Early Cenomanian
	-	19		S	Khouribga, 150 km of Casablanca (Added)	Terrestrial	coarse dark red sandstone	32.8° N	6.8° W	Tegana?	Early Cretaceous	Late Albian	Early Cenomanian
	DB 25325			C	Er Remlia, Gara es Sbaa	Terrestrial	lithified, bioturbated, red, yellow sandstone and lithified, burrowed, pebbly, red sandstone	30.3° N	4.8° W	Aoufous	Late Cretaceous	Early Cenomanian	Early Cenomanian
	DB 52887	20		A, C, S	Tafilalt	Terrestrial	red sandstone	30.9° N	4.0° W	Kem Kem	Early/Late Cretaceous	Albian	Cenomanian
	DB 60002	20		S	Taouz-Hammada du Guir plateau	Terrestrial	red sandstone	30.9° N	3.9° W	Kem Kem	Late Cretaceous	Early Cenomanian	Early Cenomanian
	DB 90078	20		S	West of Hamada du Guir	Terrestrial	coarse-grained sandstone	30.9° N	4.0° W	Kem Kem	Late Cretaceous	Cenomanian	Cenomanian
	DB 123828	20		A	Begaa	Terrestrial	sandstone	30.9° N	3.9° W	Kem Kem (Lower Member)	Late Cretaceous	Cenomanian	Cenomanian
	DB 141307	20		A, C, S	Near Taouz	Terrestrial	red sandstone	30.9° N	4.0° W	Kem Kem	Late Cretaceous	Cenomanian	Cenomanian
	DB 58519	20		S	Keneg ed Dal	Terrestrial	not reported	30.0° N	5.2° W	Kem Kem	Late Cretaceous	Early Cenomanian	Early Cenomanian
	-	20		S	18 km northeast from Erfoud	Terrestrial	fluvial sandstone	31.4° N	4.2° W	Kem Kem	Late Cretaceous	Cenomanian	Cenomanian
	DB 135639	20		C	Southeast region of Taouz	Terrestrial	lithology not reported	30.9° N	4.0° W	Ifezouane	Late Cretaceous	Cenomanian	Cenomanian
	DB 54004		X	A	Oued Zem theropod tooth (Khourigbga)	Terrestrial	brown, yellow, sandy phosphorite	32.9° N	6.6° W	Ouled Abdoun Basin	Late Cretaceous	Maastrichtian	Maastrichtian
Niger (Af)	DB 25194	21		C	El Rhaz (Lapparent site 12a, Elrhaz)	Terrestrial	sandstones	16.6° N	9.5° E	Elrhaz	Early Cretaceous	Aptian	Aptian
	DB 25197	21	X	C	34 km southwest of El Rhaz	Terrestrial	sandstones	16.4° N	9.2° E	Elrhaz	Early Cretaceous	Albian	Albian
	DB 25195	21		C	southwest of Egaro (Lapparent site 12d, El Rhaz)	Terrestrial	sandstones	16.1° N	10.2° E	Elrhaz	Early Cretaceous	Albian	Albian
	DB 81086	21		A, C	G138 (Kryptops type)	Terrestrial	lithology not reported	16.4° N	9.1° E	Elrhaz	Early Cretaceous	Aptian	Albian
	DB 81087	21		C	G88 (Eocarcharia type)	Terrestrial	lithology not reported	16.3° N	9.1° E	Elrhaz	Early Cretaceous	Aptian	Albian
	DB 25221	22		C	In Abangarit-Tasmena (Lapparent site 18)	Terrestrial	sandstone and claystone	17.7° N	5.8° E	Tegama Group	Early/Late Cretaceous	Early Albian	Early Cenomanian
	DB 58577	22		A, C, S	Iguidi (Abangarit)	Terrestrial	lithology not reported	17.9° N	5.6° E	Echkar	Late Cretaceous	Cenomanian	Cenomanian
	DB 25226			C	Oued Timmersöi (Lapparent site 22a)	Terrestrial	lithology not reported	19.3° N	6.4° E	Irhazer Group	Early Cretaceous	Early Berriasian	Late Barremian
	DB 25355			C	Oued Baouet (Lapparent site 25a)	Terrestrial	sandstone	18.0° N	9.5° E	Continental Intercalaire	Early Cretaceous	Early Berriasian	Early Cenomanian
	DB 37200	23		S	Gadoufaoua dinosaur site	Terrestrial	not reported	16.6° N	9.3° E	Elrhaz	Early Cretaceous	Aptian	Aptian
	DB 60029	23		S	Suchomimus type site	Terrestrial	medium-grained sandstone	16.4° N	9.1° E	Elrhaz	Early Cretaceous	Aptian	Albian
Portugal (Eu)	DB 49255			S	Boca do Chapim	Coastal	sandstone	38.4° N	9.2° W	Papo Seco	Early Cretaceous	Early Barremian	Early Barremian
	DB 154211			A	Cliffs of Lourinhã	Coastal	not reported	39.2° N	9.3° W	Lourinhã	Late Jurassic	Kimmeridgian	Kimmeridgian
Romania (Eu)	DB 59410		X	A	Szentpéterfalva (Sânpetru)	Terrestrial	not reported	45.6° N	22.9° E	Sânpetru	Late Cretaceous	Maastrichtian	Maastrichtian
Saudi Arabia (As)	DB 153528		X	A	Al Khurybah	Marine	sandstone and conglomerate	28.7° N	35.3° E	Adaffa	Late Cretaceous	Campanian	Maastrichtian
Spain (Eu)	FW 28006			C	Las Hoyas Unit 3	Terrestrial	large; limestone and packstone	40.1° N	1.9° E	La Huérguina	Early Cretaceous	Late Barremian	Late Barremian
	DB 28196			S	Vallipón, Castellote	Coastal	lithified, calcareous sandstone and conglomerate	40.8° N	0.3° W	Artoles	Early Cretaceous	Late Barremian	Late Barremian
	DB 28406		X	A	Laño L1A	Marine	hardground, conglomeratic sandstone and black siltstone	42.7° N	2.6° W	Vitoria	Late Cretaceous	Late Campanian	Late Campanian
	FW 36368	24		S	Cerrada Roya	Terrestrial	mudstone and sandstone	40.6° N	0.9° W	Camarillas	Early Cretaceous	Early Barremian	Early Barremian
	DB 89275	24		S	Poca (=Galve)	Terrestrial	quartzose claystone	40.6° N	0.9° W	Camarillas	Early Cretaceous	Early Barremian	Early Barremian
	DB 59075	24		S	San Cristóbal, Teruel (CT-28)	Terrestrial	marl	40.1° N	0.8° W	Camarillas	Early Cretaceous	Early Barremian	Early Barremian
	DB 45148	25	X	C	Tejería Beltrán/ Tejería Azuvi	Terrestrial	fine-grained, ferruginous, micaceous, gray, green, argillaceous, conglomeratic sandstone	40.6° N	0.1° W	Arcillas de Morella	Early Cretaceous	Early Aptian	Early Aptian
	DB 61326	25		S	Cantera del Mas de la Parreta 2	Terrestrial	green, red claystone	40.5° N	0.4° E	Arcillas de Morella	Early Cretaceous	Early Aptian	Early Aptian
	DB 61327	25		S	Cantera del Mas de la Parreta 3	Terrestrial	lenticular, brown, gray conglomerate	40.5° N	0.4° E	Arcillas de Morella	Early Cretaceous	Early Aptian	Early Aptian
	DB 89291	25		S	Cantera del Mas de la Parreta 5	Terrestrial	claystone and sandstone	40.5° N	0.4° E	Arcillas de Morella	Early Cretaceous	Early Aptian	Early Aptian
	DB 89293	25		S	Cantera del Mas de la Parreta 9	Terrestrial	red claystone	40.5° N	0.4° E	Arcillas de Morella	Early Cretaceous	Early Aptian	Early Aptian
	-	25		S	Cantera del Mas de la Parreta (Added)	Terrestrial	-	40.5° N	0.4° E	Arcillas de Morella	Early Cretaceous	Early Aptian	Early Aptian
	DB 61375	25		S	Els Ports, Morella	Terrestrial	micaceous, green, carbonaceous claystone	40.6° N	0.1° W	Arcillas de Morella	Early Cretaceous	Early Aptian	Early Aptian
	DB 51034	26		S	Tenadas de los Vallejos II	Terrestrial	red claystone and sandstone	42.0° N	3.3° W	Castrillo de la Reina	Early Cretaceous	Late Barremian	Early Aptian
	DB 68471	26		S	El Oterillo II	Terrestrial	not reported	42.0° N	3.3° W	Castrillo de la Reina	Early Cretaceous	Late Barremian	Early Aptian
	DB 89283 (Modified)	26	X	S	La Solana, Cabezón de la Sierra (Added)	Terrestrial	-	41.9° N	3.2° W	Castrillo de la Reina	Early Cretaceous	Late Barremian	Early Aptian
	DB 131492 (Modified)	26	X	S	Tenadas del Jabalí (Added)	Terrestrial	-	42.0° N	3.3° W	Castrillo de la Reina	Early Cretaceous	Late Barremian	Early Aptian
	DB 53921		X	C, S	La Cantalera, Josa	Coastal	paleosol/pedogenic, gray, carbonaceous claystone	41.0° N	0.8° W	Blesa	Early Cretaceous	Late Hauterivian	Early Barremian
	DB 59080		X	S	Ladruñán, LAD0	Terrestrial	sandstone	40.8° N	0.4° W	Mirambel	Early Cretaceous	Early Barremian	Early Barremian
	DB 157897			C	Teruel Province	Coastal	coarse-grained sandstone	40.9° N	0.2° W	Mirambel	Early Cretaceous	Early Barremian	Early Barremian
	DB 68464		X	S	Tenadas de Costalomo, Burgos	Terrestrial	sandstone	42.0° N	3.2° W	Pidrahita de Muñó	Early Cretaceous	Valangian	Late Barremian
	DB 84212	27	X	S	Senda Miravete 2	Terrestrial	carbonaceous carbonate	40.6° N	0.7° W	El Castellar	Early Cretaceous	Late Hauterivian	Early Barremian
	DB 84213	27		S	Molino alto 1	Terrestrial	carbonate	40.7° N	0.7° W	El Castellar	Early Cretaceous	Late Hauterivian	Early Barremian
	DB 96073	27	X	S	PX (=Pielago)	Terrestrial	not reported	40.6° N	0.8° W	El Castellar	Early Cretaceous	Early Barremian	Early Barremian
	DB 89271	28	X	S	La Tejera-Valdesancho	Terrestrial	not reported	42.2° N	3.2° W	"Wealden facies"	Early Cretaceous	Berriasian	Aptian
	DB 89274	28		S	Tenada de la Rosa	Terrestrial	not reported	41.9° N	3.2° W	"Wealden facies"	Early Cretaceous	Berriasian	Aptian
	DB 89277			S	El Juguete	Terrestrial	not reported	42.3° N	3.6° W	Pinilla de los Moros	Early Cretaceous	Late Hauterivian	Early Barremian
	DB 89278			S	Peña Carcena	Coastal	carbonate	42.1° N	2.0° W	Enciso Group	Early Cretaceous	Barremian	Late Aptian
	DB 132494			C	Algora vertebrate site	Terrestrial	medium-grained, coarse, ferruginous sandstone	41.0° N	2.7° W	Utrillas	Late Cretaceous	Middle Cenomanian	Late Cenomanian
Sudan (Af)	DB 38682			C	Wadi Abu Hashim	Terrestrial	coarse-grained sandstone and fine-grained siltstone	16.7° N	31.1° E	Wadi Milk	Late Cretaceous	Cenomanian	Cenomanian
Tanzania (Af)	DB 47155		X	S	Tendaguru quarry Om	Coastal	gray, green, red, sandy marl	9.7° S	39.2° E	Tendaguru (Upper Dinosaur Member)	Late Jurassic	Tithonian	Tithonian
	-		X	S	Tendaguru quarry Om (Added)	Coastal	-	9.7° S	39.2° E	Tendaguru (Middle Dinosaur Member)	Late Jurassic	Kimmeridgian	Kimmeridgian
Thailand (As)	DB 35973	29		S	Phu Wiang 1, Khon Kaen	Terrestrial	lithified, gray, green, red siltstone and fine-grained, green sandstone	16.7° N	102.3° E	Sao Khua	Early Cretaceous	Barremian	Aptian
	DB 35974	29		S	Phu Wiang 1A, Khon Kaen	Terrestrial	fine-grained, green sandstone and lithified, gray, green, red siltstone	16.7° N	102.3° E	Sao Khua	Early Cretaceous	Barremian	Aptian
	DB 36082	29	X	S	Phu Wiang 5A, Khon Kaen	Terrestrial	red claystone and concretionary, calcareous conglomerate	16.7° N	102.3° E	Sao Khua	Early Cretaceous	Barremian	Aptian
	DB 36144	29		S	Phu Pum Khao, K4 (Wat Sakawan), Kalasin	Terrestrial	lithified sandstone and siltstone	16.7° N	103.6° E	Sao Khua	Early Cretaceous	Barremian	Aptian
	DB 84443	29		S	Khok Kong	Terrestrial	red siltstone	16.8° N	103.7° E	Sao Khua	Early Cretaceous	Barremian	Aptian
	DB 79489	29		S	Phu Phok	Terrestrial	concretionary, pebbly, brown, red siltstone	16.9° N	104.1° E	Sao Khua	Early Cretaceous	Barremian	Aptian
	DB 52346	30		S	Khok Pha Suam	Terrestrial	not reported	15.2° N	104.9° E	Khok Kruat	Early Cretaceous	Aptian	Albian
	DB 93887	30		S	Phu Hin Rong, Khon Kaen	Terrestrial	red siltstone	16.4° N	102.8° E	Khok Kruat	Early Cretaceous	Aptian	Albian
	-	30	X	S	Near Khon Kaen (Added)	Terrestrial	-	-	-	Khok Kruat	Early Cretaceous	Aptian	Albian
Tunisia (Af)	DB 25200	31		C	Djebbel el Haddada (Lapparent site 14b)	Terrestrial	pebbly, sandy sandstone and claystone	33.0° N	10.3° E	Continental Intercalaire	Early Cretaceous	Early Albian	Early Cenomanian
	DB 32322	31		S	Ouaja, Jebel Miteur	Terrestrial	sandstone and limestone	33.2° N	10.3° E	Chenini	Early Cretaceous	Early Albian	Early Albian
	DB 67203	31		C, S	Bir Miteur, RH 45, Jebel Miteur	Terrestrial	sandy carbonate	33.2° N	10.3° E	Chenini (Radouane Member)	Early Cretaceous	Early Albian	Early Albian
United Kindom (Eu)	DB 45193	32		S	Smokejacks Brickworks	Terrestrial	lithified, bioturbated, fine-grained, concretionary, gray, green, sandy claystone and lithified, sideritic siltstone	51.1° N	0.3° E	Weald Clay	Early Cretaceous	Early Barremian	Early Barremian
	DB 45194	32	X	S	Ewhurst Brickworks	Terrestrial	not reported	51.1° N	0.4° E	Weald Clay	Early Cretaceous	Late Barremian	Early Aptian
	DB 45195		X	S	Redlands Brick, Bexhill-on-Sea	Terrestrial	not reported	50.9° N	0.5° E	Ashdown	Early Cretaceous	Early Berriasian	Early Valangian
	DB 53886	33	X	S	Yaverland Battery south, Isle of Wight	Terrestrial	not reported	50.7° N	1.1° W	Wessex	Early Cretaceous	Late Hauterivian	Early Barremian
	DB 53888	33	X	S	Hanover Point theropod tooth, Isle of Wight	Terrestrial	not reported	50.7° N	1.5° W	Wessex	Early Cretaceous	Late Hauterivian	Early Barremian
	DB 96621			S	Pevensey Pit, Ashdown Brickworcks	Terrestrial	conglomeratic claystone and siltstone	50.9° N	0.4° E	Tunbridge Wells Sand (Lower Member)	Early Cretaceous	Late Valangian	Late Valangian
	(based on DB 52258)			S	Tilgate Forest/ Cuckfield after Mantell, 1822 (Added)	Terrestrial	not reported	51.1° N	0.2° W	Tilgate Grit Member (Grinstead Clay Formation)	Early Cretaceous	Late Valangian?	Late Valangian?
U.S.A. (NA)	FW 14392	34	X	C	McLeod Prison (OMNH V706), Tomato Hill	Terrestrial	concretionary, gray, green, red claystone and poorly lithified, lenticular, brown, yellow sandstone	34.4° N	96.1° W	Middle Member (Antlers Formation)	Early Cretaceous	Late Aptian	Early Albian
	DB 25148	34		C	Arnold farm (Acrocanthosaurus paratype site)	Terrestrial	gray, yellow sandstone and gray claystone	34.2° N	95.8° W	Antlers	Early Cretaceous	Aptian	Aptian
	DB 25149	34		C	Cochran farm (Acrocanthosaurus holotype site)	Terrestrial	brown, red, sandy shale	34.2° N	95.8° W	Antlers	Early Cretaceous	Aptian	Aptian
	DB 25147	34		C	McCurtain County theropod site	Terrestrial	lithology not reported	34.2° N	94.8° W	Antlers	Early Cretaceous	Aptian	Aptian
	DB 25141		X	S	Calico Gulch Dinosaur Quarry	Terrestrial	not reported	40.5° N	108.4° W	Morrison	Late Jurassic	Kimmeridgian	Tithonian
	DB 51709			C	Hobson Ranch, SMU locality 261	Terrestrial	concretionary, cherty/siliceous sandstone	32.7° N	97.8° W	Twin Mountains	Early Cretaceous	Late Aptian	Late Aptian
	DB 90926			C	Cherokee-Sanford Brick Clay Pit (=Hotton locality)	Terrestrial	gray, red claystone	39.0° N	76.1° W	Patuxent	Early Cretaceous	Late Aptian	Late Aptian

## Sheet: Discarded PBDB Occurrences
Country (Continent)	Collection number (PaleoDB)	Location	Taxon	References in PBDB	Paleoenvironment	Lithology	Latitude	Longitude	Formation	Epoch	Earliest stage	Latest stage	Additional References
Algeria (Af)	DB 59341	Oued Boudjihane	Carcharodontosaurus sp.	Bassoullet and Iliou, 1967	Terrestrial	poorly lithified, lenticular, fine-grained, yellow, sandy sandstone and gypsiferous, red, sandy claystone	32.7° N	0.8° E	Continental Intercalaire	Early Cretaceous	Albian	Albian
Argentina (SA)	DB 85571	Picún Leufú tracksite, El Chocón	Abelisauridae?	Leonardi, 1994	Terrestrial	sandstone	39.5° S	69.3° W	Huincul	Late Cretaceous	Late Cenomanian	Turonian
	DB 80388	La Invernada	Carnotaurinae	González-Riga et al., 2008	Terrestrial	gray, green mudstone	37.5° S	69.2° W	Allen	Late Cretaceous	Late Campanian	Early Maastrichtian
	DB 130985	Jugo Loco	Eoabelisaurus	Pol and Rauhut, 2012	Terrestrial	large; calcareous mudstone	43.8° S	71.6° W	Cañadón Asfalto Formation	Middle Jurassic	Aalenian	Bajocian	[57]
	DB 162466	La Juanita Estancia, Raúl site	Tyrannotitan chubutensis	Novas et al., 2005	terrestrial	not reported	43.8° S	68.8° W	Cerro Castaño Member (Cerro Barcino Formation)	Early Cretaceous	Aptian	Aptian
France (Eu)	DB 28456	Lambeau de Beausset	Tarascosaurus	Le Loeuff & Buffetaut, 1991	Terrestrial	gray limestone	43.2° N	5.8° E	"Fuvelian"	Early Cretaceous	Early Campanian	Early Campanian	[2]
	DB 70458	Sisteron, Bevons (Genusaurus type)	Genusaurus sisteroni	Accarie et al., 1995	Marine	glauconitic, green, argillaceous sandstone	44.2° N	5.9° E	-	Early Cretaceous	Middle Albian	Middle Albian	[2]
Japan (As)	DB 97938	Kanna, Sebayashi	cf. Spinosauridae	Molnar et al., 2009	Marine	conglomerate and sandstone	36.1° N	138.9° E	Sebayashi (Lower Member)	Early Cretaceous	Late Hauterivian	Early Barremian
Kazakhstan (As)	DB 53132	Sary-Agach, Chingeldy (=Kyrkkuduk I )		Riabinin, 1938	?	conglomerate	44.0° N	77.5° E	Dabrazhin	Late Cretaceous	Coniacian	Santonian
Madagascar (Af)	DB 144728	Lac Kinkony shores	Majungassaurus	Rogers et al., 2013	Terrestrial	gray, silty claystone and white, calcareous sandstone	16.1° S	45.7° E	Maevarano (Lac Kinkony Member)	Late Cretaceous	Maastrichtian	Maastrichtian	[10]
Morocco (Af)	DB 25325	Er Remlia, Gara es Sbaa	S. cf. aegyptiacus	Sereno et al., 1996	Terrestrial	lithified, bioturbated, red, yellow sandstone and lithified, burrowed, pebbly, red sandstone	30.3° N	4.8° W	Aoufous	Late Cretaceous	Early Cenomanian	Early Cenomanian	[58, 59]
	DB 115155	Bordj-Yerdi sand quarry	Spinosaurus sp.	Evans and Manabe, 1999	Terrestrial	poorly lithified, gray, yellow sandstone and burrowed, paleosol/pedogenic siliciclastic	31.6° N	4.2° W	Kem Kem	Late Cretaceous	Cenomanian	Cenomanian
Niger (Af)	DB 133668	Laganemys type, Gadoufaoua	Suchomimus	Sereno and ElShafie, 2012	Terrestrial	medium-grained sandstone	16.4° N	9.1° E	Elrhaz	Early Cretaceous	Aptian	Albian
Spain (Eu)	DB 61324	Catedrático, Morella	"Suchosaurus"	Beltrán, 1918; Rojo y Gómez, 1927	terrestrial	not reported	40.6° N	0.1° W	Arcillas de Morella	Early Cretaceous	Early Aptian	Early Aptian
	DB 61325	Cantera del Mas de la Parreta 1	Baryonychinae	Canudo et al., 2004	Terrestrial	claystone	40.5° N	0.4° E	Arcillas de Morella	Early Cretaceous	Early Aptian	Early Aptian
Thailand (As)	DB 36150	Ban Non Mek, K2, Kalasin	"Siamosaurus"	Martin et al., 1993	Terrestrial	concretionary, calcareous conglomerate	16.4° N	104.1° E	Sao Khua	Early Cretaceous	Barremian	Aptian
	DB 92261	Khok Pia, Khon-Kaen		Buffetaut et al., 2002	Terrestrial	not reported	16.4° N	102.8° E	Khok Kruat	Early Cretaceous	Aptian	Albian
United Kingdom (Eu)	DB 58094	Hare Farm Lane, Brede	Baryonychinae	Benton and Spencer, 1995	Terrestrial	bioturbated, argillaceous sandstone and siltstone	50.9° N	0.6° E	Wadhurst Clay	Early Cretaceous	Valangian	Valanagian

## Sheet: References
References
1.	Bonaparte JF, Novas FE, Coria RA. Carnotaurus sastrei Bonaparte, the horned, lightly built carnosaur from the Middle Cretaceous of Patagonia. Countributions in Science. 1990;416:1-42.
2.	Carrano MT, Sampson SD. The Phylogeny of Ceratosauria (Dinosauria: Theropoda). J Syst Palaeontol. 2008;6(2):183–236. doi: 10.1017/S1477201907002246.
3.	Weishampel DB, Dodson P, Osmolska H. The Dinosauria. 2nd Ed. ed. Berkley: University of California; 2004.
4.	Coria RA, Currie PJ, Carabajal AP. A new abelisauroid theropod from northwestern Patagonia. Can J Earth Sci. 2006;43:1283-9
5.	Juárez Valieri RD, Porfiri J, Calvo JO. New Information on Ekrixinatosaurus novasi Calvo et al 2004, a giant and massively-constructed Abelisauroid from the “Middle Cretaceous” of. In: Calvo JO, Porfiri J, Riga BG, Santos D, editors. Paleontologia y dinosaurios desde América Latina. Mendoza: Universidade Nacional de Cuyo; 2011. p. 161-9.
6.	Kellner AWA, Campos DA. On a Theropod dinosaur (Abelisauria) from the continetal Cretaceous of Brazil. Arquivos do Museu Nacional, Rio de Janeiro. 2002;60(3):163-70.
7.	Bertini RJ. Evidências de Abelisauidae (Carnosauria: Saurischia) do Neocretáceo da Bacia do Paraná. Boletim do 4O Simpósio sobre o Cretáceo do Brasil; UNESP, Rio Claro. 1996. p. 267-71.
8.	Ezcurra MD. Theropod remains from the uppermost Cretaceous of Colombia and their implications for the palaeozoogeography of western Gondwana. Cretaceous Research. 2009;30:1339–44.
9.	Buffetaut E. Late Cretaceous vertebrates from the Saint-Chinian area (Southern France): a review of previous research and an update on recent finds. Acta Palaeontologica Romaniae. 2005;5:39-48.
10.	Krause DW, Sampson SD, Carrano MT, O´Connor PM. Overview of the history of discovery, taxonomy, phylogeny, and biogeography of Majungasaurus crenatissimus (Theropoda: Abelisauridae) from the Late Cretaceous of Madagascar. Journal of Vertebrate Paleontology. 2007;27(Special Issue 8):1-20.
11.	Sampson SD, Krause DW, Dodson P, Forster CA. The premaxilla of Majungasaurus (Dinosauria: Theropoda), with implications for Gondwanan paleobiogeogrphy. Journal of Vertebrate Paleontology. 1996;16(4):601-5. doi: dx.doi.org/10.1080/02724634.1996.10011350.
12.	Lapparent AF. Les Dinosauriens du "Continental intercalaire" du Saharal central. Mémoires de la Société Géologique de France, nouvelle série. 1960;39(88A):1-57.
13.	Carrano MT, Benson RBJ, Sampson SD. The phylogeny of Tetanurae (Dinosauria: Theropoda). J Syst Palaeontol. 2012;10(2):211-300. doi: dx.doi.org/10.1080/14772019.2011.630927.
14.	Coria RA, Salgado L. A new giant carnivorous dinosaur from the Cretaceous of Patagonia. Nature. 1995;377:224-6.
15.	Calvo JO, Coria RA. Palaeoenvironmental controls on the distribution of Cretaceous herbivorous dinosaurs. Gaia. 1988;15:117-22.
16.	Canudo JI, Filippi L, Salgado L, Garrido A, Cerda IA, García R, et al. Dientes de terópodos asociados con una carcasa de saurópodo en el Cretácico Superior (Formación Plottier) de Rincón de los Sauces (Patagonia, Argentina). In: Hurtado PH, Baldor FTF, editors. IV Jornadas Internacionales sobre Paleontología de Dinosaurios y su Entorno; Salas de los Infantes, Burgos, Spain2009. p. 321-30.
17.	Medeiros MA, Lindoso RM, Mendes ID, Carvalho IS. The Cretaceous (Cenomanian) continental record of the Laje do Coringa flagstone (Alcântara Formation), northeastern South America. Journal of South American Earth Sciences. 2014;53:50-8.
18.	Medeiros MA, Schultz CL. Uma paleocomunidade de vertebrados do Cretáceo médio, Bacia de São Luís. In: Rossetti DF, Góes AM, Truckenbrodt W, editors. O Cretáceo da Bacia de São Luís-Grajaú. 1. Belém: Museu Paraense Emilio Goeldi; 2001. p. 209-21.
19.	Rauhut O. A dinosaur fauna from the Late Cretaceous (Cenomanian) of Nothern Sudan. Palaeontologia Africana. 1999;35:61-84.
20.	Salgado L, Canudo JI, Garrido A, Ruiz-Omeñaca JI, García RA, de la Fuente MS, et al. Upper Cretaceous vertebrates from El Anfiteatro area, Río Negro, Patagonia,Argentina. Cretaceous Research. 2009;30:767-84.
21.	Sues HD-, Frey E, Martill D, Scott DM. Irritator challengeri, a spinosaurid (Dinosauria: Theropoda) from the Lower Cretaceous of Brazil. Journal of Vertebrate Paleontology. 2002;22(3):535-47.
22.	Machado EB, Kellner AWA. An overview of the Spinosauridae (Dinosauria, Theropoda) with comments on the brazilian material. Journal of Vertebrate Paleontology. 2008;28(3 (Abstracts)):109A.
23.	Buffetaut E, Martill D, Escuillié F. Pterosaurs as part of a spinosaur diet. Nature. 2004;430:33.
24.	Elias FA. Dentes de amniotas da Laje do Coringa (Formação Alcântera, Albo-Cenomaniano da Bacia de São Luís- Grajaú): Identificação, descrição, aspectos paleobiológicos, biocronológicos, paleogeográficos e paleobiogeográficos. Rio Claro: Universidade Federal Paulista; 2006.
25.	Bertin T. A catalogue of material and review of the Spinosauridae. Palarch’s Journal of Vertebrate Palaeontology. 2010;7(4):1-39.
26.	Buffetaut E. The biogeography of spinosaurid dinosaurs: a review. In: Fanti F, Spaletta C, editors. International Conference on Vertebrate Palaeobiogeography and continental bridges across Tethys. Abstract book – Bologna, Museo Geologico Giovanni Cappellini, Dipartimento di Scienze della Terra e Geologico-Ambintali2009. p. 18-20.
27.	Congleton JD. Vertebrate Paleontology of the Koum Basin, Northern Cameroon, and Archosaurian Paleobiogeography in the Early Cretaceous. Dallas: Southern Methodist University; 1990.
28.	Churcher CS, De Iuliis G. A new species of Protopterus and a revision of Ceratodus humei (Dipnoi: Ceratodontiformes) from the Late Cretaceous Mut Formation of Eastern Dakhleh Oasis, western desert of Egypt. Palaeontology. 2001;44(2):305-23.
29.	Molnar RE, Obata I, Tanimoto M, Matsukawa M. A tooth of Fukuiraptor aff. F. kitadaniensis from the Lower Cretaceous Sebayashi Formation, Sanchu Cretaceous, Japan(Bulletin of Tokyo Gakugei University, Division of Natural Sciences. 2009;61:105-17.
30.	Charig AJ, Milner AC. Baryonyx walkeri, a fish-eating dinosaur from the Wealden of Surrey. Bulletin of the Natural History Museum, Geology Series. 1997;53(1):11-70.
31.	Niedzwiedzki G, Gierlinski G. Isolated theropod teeth from the Cretaceous strata of Khouribga, Morocco. Geological Quarterly. 2002;46(1):97-100.
32.	Ruiz-Omeñaca JI, Canudo JI, Cuenca-Bescós G. Primera cita de dinosaurios barionícidos (Saurichia: Theropoda) en el Barremiense superior (Cretácico Inferior) de Vallipón (Castellote, Teruel). . Museo de Mas de la Matas. 1998;17:201-23.
33.	Ibrahim N, Sereno PC, Dal Sasso C, Maganuco S, Fabbri M, Martill D, et al. Semiaquatic adaptations in a giant predatory dinosaur. Science. 2014;345 (6204):1613–6. doi: 10.1126/science.1258750.
34.	Taquet P, Russell DA. New data on spinosaurid dinosaurs from the Early Cretaceous of the Sahara. Comptes Rendus de l'Académie des Sciences à Paris, Sciences de la Terre et des Planètes. 1998;327:347-53.
35.	Kellner AWA, Campos DA. First Early Cretaceous theropod dinosaur from Brazil with comments on Spinosauridae. Neues Jahrbuch für Geologie und Paläontologie - Abhandlungen. 1996;199(2):151-66.
36.	Mateus O, Araújo R, Natário C, Castanhinha R. A new specimen of the theropod dinosaur Baryonyx from the early Cretaceous of Portugal and taxonomic validity of Suchosaurus. Zootaxa. 2011;2827:54-68.
37.	Canudo JI, Ruiz-Omeñaca JI. Los restos directos de dinosaurios teropódos (excluyendo Aves) en España. Ciencias de la Tierra 2003;26:347-73.
38.	Torcida Fernández-Baldor F, Canudo JI, Huerta P, Izquierdo Montero LA, Montero Huerta D, Contreras Izquierdo R, et al. Primeros datos sobre las vértebras caudales del saurópodo de El Oterillo II (Formación Castrillo de la Reina, Barremiense superior-Aptiense, Cretácico Inferior. IV Jornadas Internacionales sobre Paleontología de Dinosaurios y su Entorno; Salas de los Infantes, Burgos, Spain2009. …
39.	Contreras-Izquierdo R, Cruzado-Caballero P, Torcida Fernández Baldor F, Huerta P, Izquierdo Montero LA, Montero Huerta D, et al., editors. Un ilion de un dinosaurio “iguanodóntido” procedente del Cretácico Inferior de Burgos (España). Actas de las IV Jornadas Internacionales sobre Paleontología de Dinosaurios y su Entorno; 2008; Burgos, Spain.
40.	Torcida Fernández F, Izquierdo Montero LA, Huerta Hurtado P, Montero Huerta P, Pérez Martínez G. Dientes de dinosaurios (Theropoda, Sauropoda) en el Cretácico Inferior de Burgos (España). In: Pérez-Lorente F, editor. Congreso Internacional sobre Dinosaurios y otros Reptiles Mesozoicos de España; 27-29 of November; Logroño Resúmenes de las comunicaciones y ponencias; 2003. p. 335-46.
41.	Gasulla JM, Ortega F, Escaso F, Sanz JL. Diversidad de terópodos del Cretácico Inferior (Fm. Arcillas de Morella, Aptiense) en los yacimientos del Mas de la Parreta (Morella, Castellón). In: Fernández-Martínez E, editor. XXII Jornadas de Paleontología2006. p. 124-5.
42.	Gasulla JM, Escaso F, Ortega F, Sanz JL. A reappraisal of the spinosaurid baryonychines from the Arcillas de Morella Formation (lower Aptian) of Morella, Spain. In: Fernández-Balor FT, Huerta P, editors. VI Jornadas Internacionais sobre Paleontología de Dinosaurios y su entorno; Salas de los Infantes, Burgos, Spain: Colectivo Arqueológico y Paleontológico de Salas; 2013. p. 76.
43.	Gasulla JM, Ortega F, Escaso F, Pérez-García A. Los yacimientos de vertebrados de la Formación Arcillas de Morella (Aptiense inferior). In: Pérez-García A, Gascó F, Gasulla JM, Escaso F, editors. Viajando a mundos pretéritos. Ayuntamiento de Morella2011. p. 157-71.
44.	Canudo JI, Gasulla JM, Ortega F, Ruiz-Omeñaca JI. Presencia de Baryonychinae (Theropoda) en el Aptiense inferior (Cretácico Inferior) de Laurasia: Cantera Mas de la Parreta, Formación Arcillas de Morella (Morella, Castellón). III Jornadas Internacionales sobre Paleontología de Dinosaurios y su Entorno; Salas de los Infantes, Burgos, Spain2004.
45.	Gasulla JM, Ortega F, Sanz JL, Escaso F, Pérez García A. A spinosaurid cervical vertebra from the Morella Formation (lower Aptian) of Morella, Spain. In: Schwarz-Wings D, Wings O, Sattler F, editors. 7th Annual Meeting of the European Association of Vertebrate Palaeontologists; July 20-24; Berlin2009. p. 31.
46.	Gasca JM, Canudo JI, Moreno-Azanza M. Dientes aislados de dinosaurio de la Formación El Castellar en Miravete de la Sierra (Cretácico Inferior, Teruel, España). Actas de las IV Jornadas Internacionales sobre Paleontología de Dinosaurios y su Entorno; Salas de los Infantes, Burgos, Spain2009. p. 221-34.
47.	Ruiz-Omeñaca JI, Canudo JI. Dinosaurios (Saurischia, Ornithischia) en el Barremiense (Cretácico inferior) de la Península Ibérica. In: Lorente, F. P., Molina MMR, Carrera PR, editors. Dinosaurios y otros reptiles mesozoicos en España Ciencias de la Tierra, 26. La Rioja: Universidad de La Rioja : Instituto de Estudios Riojanos; 2003. p. 269-312.
48.	Buffetaut E, Suteethorn V, Tong H. An early ‘ostrich dinosaur’ (Theropoda: Ornithomimosauria) from the Early Cretaceous Sao Khua Formation of NE Thailand. In: Buffetaut E, Cuny G, Le Loeuff J, Suteethorn V, editors. Late Palaeozoic and Mesozoic Ecosystems in SE Asia. Special Publications, 315. London: The Geological Society; 2009. p. 229–43.
49.	Buffetaut E. An early spinosaurid dinosaur from the Late Jurassic of Tendaguru (Tanzania) and the evolution of the spinosaurid dentition. ORYCTOS. 2011;10:1-8.
50.	Buffetaut E, Suteethorn V. A sauropod skeleton associated with theropod teeth in the Upper Jurassic of Thailand: remarks on the taphonomic and palaeoecological significance of such associations. Palaeogeogr, Palaeoclimatol, Palaeoecol. 1989;73:77-83.
51.	Buffetaut E, Escuillié F, Pohl B. First theropod dinosaur from the Maastrichtian phosphates of Morocco. Current Research in Vertebrate Palaeontolgy, 3rd Annual Meeting of the European Association of Vertebrate Palaeontologists (EAVP); Hessisches Landesmuseum Darmstadt2005. p. 3-8.
52.	Milner A, Buffetaut E, Suteethorn V. A tall–spined spinosaurid theropod from Thailand and the biogeography of spinosaurs. Journal of Vertebrate Paleontology. 2007;27:118A.
53.	Martill D, Hutt S. Possible baryonychid dinosaur teeth from the Wessex Formation (Lower Cretaceous, Barremian) of the Isle of Wight, England. P Geologist Assoc. 1996;107:81-4.
54.	Naish D, Sweetman S. A tiny maniraptoran dinosaur in the Lower Cretaceous Hastings Group: Evidence from a new vertebrate-bearing locality in south-east England. Cretaceous Research. 2011;32:464-71.
55.	Buffetaut E. Spinosaurs before Stromer: early finds of spinosaurid dinosaurs and their interpretations. In: Moody RTJ, Buffetaut E, Naish D, Martill D, editors. Dinosaurs and Other Extinct Saurians: A Historical Perspective. Special Publications, 343: Geological Society, London,; 2010. p. 175-88.
56.	Blows WT. A review of Lower and Middle Cretaceous dinosaurs of England. In: Lucas SG, Kirkland JI, Estep JW, editors. Lower and Middle Cretaceous Terrestrial Ecosystems. Bulletin 14: New Mexico Museum of Natural History and Science; 1998. p. 29-38.
57.	Tortosa T, Buffetaut E, Vialle N, Y. D, Turini E, Cheylan G. A new abelisaurid dinosaur from the Late Cretaceous of southern France: Palaeobiogeographical implications. Ann Paleontol. 2014;100:63-86.
58.	Dal Sasso C, Maganuco S, Buffetaut E, Mendez MA. New information on the skull of the enigmatic theropod Spinosaurus, with remarks on its size and affinities. Journal of Vertebrate Paleontology. 2005;25(4):888-96.
59.	Brusatte SL, Sereno PC. A new species of Carcharodontosaurus (Dinosauria: Theropoda) from the Cenomanian of Niger and a revision of the genus. Journal of Vertebrate Paleontology. 2007;27(4):902-16.
